# Supplementary material for: Ebola Entry Inhibitors Discovered from Maesa perlarius
Source: MDPI journal article supplement (doi:10.3390/ijms23052620), 2022-02-27
Supplement: s1 [file s1]

# Ebola Entry Inhibitors Discovered from *Maesa perlarius*

Nga Yi Tsang <sup>1,†</sup>, Wan-Fei Li <sup>1,†</sup>, Elizabeth Varhegyi<sup>2,†</sup>, Lijun Rong <sup>2,\*</sup> and Hong-Jie Zhang <sup>1,\*</sup>

<sup>1</sup> Teaching and Research Division, School of Chinese Medicine, Hong Kong Baptist University, Kowloon, Hong Kong SAR, China;

[12012173@life.hkbu.edu.hk](mailto:12012173@life.hkbu.edu.hk) (N.Y.T.); [wanfeier@live.cn](mailto:wanfeier@live.cn) (W.-F.L.)

<sup>2</sup> Department of Microbiology and Immunology, College of Medicine, University of Illinois Chicago, 909 South Wolcott Ave, Chicago, Illinois 60612, United States; [estark2434@gmail.com](mailto:estark2434@gmail.com)

\* Correspondence: [zhanghj@hkbu.edu.hk](mailto:zhanghj@hkbu.edu.hk) (H.-J.Z.); Tel.: +852 34112956; [lijun@uic.edu](mailto:lijun@uic.edu) (L.R.); Tel.: +1 312-3550203

<sup>†</sup> These authors contribute equally to this work.

## Supplementary Materials

# Table of Contents

|                                                                                                                                                                                                                                        |    |
|----------------------------------------------------------------------------------------------------------------------------------------------------------------------------------------------------------------------------------------|----|
| <b>Table S1.</b> Preparative HPLC condition to separate compounds from <i>M. perlarius</i> fractions .....                                                                                                                             | 4  |
| <b>Figure S1.</b> The chromatograms of preparative HPLC for fractions F64-B19, F64-B20 and F64-B1617 recorded at UV 210 nm .....                                                                                                       | 4  |
| <b>Figure S2.</b> UPLC chromatograms of compounds <b>1-5</b> isolated from fractions B19 and B20 recorded at UV 210 nm.....                                                                                                            | 5  |
| <b>Figure S3.</b> MS spectra of compounds <b>1-5</b> .....                                                                                                                                                                             | 6  |
| <b>Table S2.</b> Comparison of the MS data of <b>1-5</b> and their reported literature data.....                                                                                                                                       | 7  |
| <b>Figure S4.</b> MS <sup>2</sup> spectra of <b>1-5</b> .....                                                                                                                                                                          | 8  |
| <b>Figure S5.</b> <sup>1</sup> H NMR spectrum of <b>1</b> in CD <sub>3</sub> OD (400 MHz).....                                                                                                                                         | 9  |
| <b>Figure S6.</b> <sup>1</sup> H NMR spectrum of <b>2</b> in CD <sub>3</sub> OD (400 MHz).....                                                                                                                                         | 9  |
| <b>Figure S7.</b> <sup>1</sup> H NMR spectrum of <b>3</b> in CD <sub>3</sub> OD (400 MHz).....                                                                                                                                         | 10 |
| <b>Table S3.</b> Comparison of <sup>1</sup> H NMR spectral data of the literature procyanidin B2 and compound <b>1</b> .....                                                                                                           | 11 |
| <b>Table S4.</b> Comparison of <sup>1</sup> H NMR spectral data of the literature procyanidin C1 and compound <b>2</b> .....                                                                                                           | 12 |
| <b>Table S5.</b> Comparison of <sup>1</sup> H NMR spectral data of the literature procyanidin tetramer epicatechin-(4β→8)-epicatechin-(4β→8)-epicatechin-(4 β→8)-epicatechin and compound <b>3</b> .....                               | 13 |
| <b>Figure S8.</b> IR spectrum of <b>1</b> .....                                                                                                                                                                                        | 14 |
| <b>Figure S9.</b> IR spectrum of <b>2</b> .....                                                                                                                                                                                        | 14 |
| <b>Figure S10.</b> IR spectrum of <b>3</b> .....                                                                                                                                                                                       | 15 |
| <b>Figure S11.</b> IR spectrum of <b>4</b> .....                                                                                                                                                                                       | 15 |
| <b>Figure S12.</b> IR spectrum of <b>5</b> .....                                                                                                                                                                                       | 16 |
| <b>Figure S13.</b> UV spectrum of <b>1</b> .....                                                                                                                                                                                       | 17 |
| <b>Figure S14.</b> UV spectrum of <b>2</b> .....                                                                                                                                                                                       | 17 |
| <b>Figure S15.</b> UV spectrum of <b>3</b> .....                                                                                                                                                                                       | 17 |
| <b>Figure S16.</b> UV spectrum of <b>4</b> .....                                                                                                                                                                                       | 18 |
| <b>Figure S17.</b> UV spectrum of <b>5</b> .....                                                                                                                                                                                       | 18 |
| <b>Figure S18.</b> <i>In vitro</i> dose-response curves of plant extract fractions, flavan-3-ols and their derivatives on pseudovirion HIV-Luc/EBOV-GP. samples were evaluated in A549 cells against pseudovirion HIV-Luc/EBOV-GP..... | 19 |
| <b>Figure S19.</b> Chemical structures of flavanones showing no inhibitory effects against EBOV pseudovirus at concentrations of 50 μm.....                                                                                            | 19 |
| <b>Figure S20.</b> <sup>1</sup> H NMR spectrum of <b>12</b> in CDCl <sub>3</sub> (400 MHz).....                                                                                                                                        | 20 |
| <b>Figure S21.</b> <sup>1</sup> H NMR spectrum of <b>13a</b> in CDCl <sub>3</sub> (400 MHz).....                                                                                                                                       | 21 |
| <b>Figure S22.</b> <sup>1</sup> H NMR spectrum of <b>13b</b> in CD <sub>3</sub> OD (400 MHz).....                                                                                                                                      | 22 |
| <b>Figure S23.</b> <sup>1</sup> H NMR spectrum of <b>14a</b> in CDCl <sub>3</sub> (400 MHz).....                                                                                                                                       | 23 |
| <b>Figure S24.</b> <sup>13</sup> C NMR spectrum of <b>14a</b> in CDCl <sub>3</sub> (100 MHz).....                                                                                                                                      | 24 |
| <b>Figure S25.</b> <sup>1</sup> H NMR spectrum of <b>14b</b> in acetone-d <sub>6</sub> (400 MHz).....                                                                                                                                  | 25 |
| <b>Figure S26.</b> <sup>13</sup> C NMR spectrum of <b>14b</b> in acetone-d <sub>6</sub> (100 MHz) .....                                                                                                                                | 26 |
| <b>Figure S27.</b> <sup>1</sup> H NMR spectrum of <b>15a</b> in CDCl <sub>3</sub> (400 MHz).....                                                                                                                                       | 27 |
| <b>Figure S28.</b> <sup>13</sup> C NMR spectrum of <b>15a</b> in CDCl <sub>3</sub> (100 MHz).....                                                                                                                                      | 28 |
| <b>Figure S29.</b> <sup>1</sup> H NMR spectrum of <b>15b</b> in acetone-d <sub>6</sub> (400 MHz).....                                                                                                                                  | 29 |

|                                                                                                                                                              |    |
|--------------------------------------------------------------------------------------------------------------------------------------------------------------|----|
| <b>Figure S30.</b> $^{13}\text{C}$ NMR spectrum of <b>15b</b> in acetone- $\text{d}_6$ (100 MHz) .....                                                       | 30 |
| <b>Figure S31.</b> $^1\text{H}$ NMR spectrum of <b>16a</b> in $\text{CDCl}_3$ (400 MHz) .....                                                                | 31 |
| <b>Figure S32.</b> $^{13}\text{C}$ NMR spectrum of <b>16a</b> in $\text{CDCl}_3$ (100 MHz).....                                                              | 32 |
| <b>Figure S33.</b> $^1\text{H}$ NMR spectrum of <b>16b</b> in acetone- $\text{d}_6$ (400 MHz).....                                                           | 33 |
| <b>Figure S34.</b> $^{13}\text{C}$ NMR spectrum of <b>16b</b> in acetone- $\text{d}_6$ (100 MHz) .....                                                       | 34 |
| <b>Figure S35.</b> $^1\text{H}$ NMR spectrum of <b>17a</b> in $\text{CDCl}_3$ (400 MHz).....                                                                 | 35 |
| <b>Figure S36.</b> $^1\text{H}$ NMR spectrum of <b>17b</b> in $\text{CDCl}_3$ (400 MHz).....                                                                 | 36 |
| <b>Figure S37.</b> Binding modes of compounds docked to ebola virus glycoprotein crystal structure 5JQ7 .....                                                | 38 |
| <b>Figure S38.</b> The correlation between the docking score and the $\text{IC}_{50}$ values for B-type procyanidins, flavan-3-ols and their analogues ..... | 38 |
| <b>Figure S39.</b> Thermographs of toremifene or procyanidin B2 ( <b>1</b> ) (labeled as PB2) in PBST/M-PER buffer bound to the target protein EBOV-GP.....  | 39 |
| <b>Figure S40.</b> Dose-response curve for the binding interaction between pCMV (negative control) and toremifene/procyanidin B2 ( <b>1</b> ) (PB2).....     | 39 |
| <b>Table S6.</b> Dataset overview of MST experiments for toremifene and procyanidin B2 ( <b>1</b> ).....                                                     | 39 |

**Table S1.** Preparative HPLC condition to separate compounds from *M. perlarius* fractions.

|                      |                                                                                                                                                                                                                                       |
|----------------------|---------------------------------------------------------------------------------------------------------------------------------------------------------------------------------------------------------------------------------------|
| Column               | Altmann Analytik Saphir 110 C18, 12 $\mu$ m (300×40mm)                                                                                                                                                                                |
| Mobile phase         | Gradient Water (A) with MeCN(B)                                                                                                                                                                                                       |
| Mobile phase program | For F64-B19: 14-16% (B) in 0-60 min, 16% (B) in 60-100 min<br>For F64-B20: 14% (B) in 0-30 min, 14-17% (B) in 30-75 min and 17% (B) in 75-115 min<br>F64-B1617: 15% (B) in 0-45 min, 15-20% (B) in -100 min and 17% (B) in 75-115 min |
| Column temperature   | room temperature                                                                                                                                                                                                                      |
| Sample concentration | 100 mg/ml                                                                                                                                                                                                                             |
| Injection volume     | 150 $\mu$ l                                                                                                                                                                                                                           |
| Flow rate            | 20 ml/min                                                                                                                                                                                                                             |

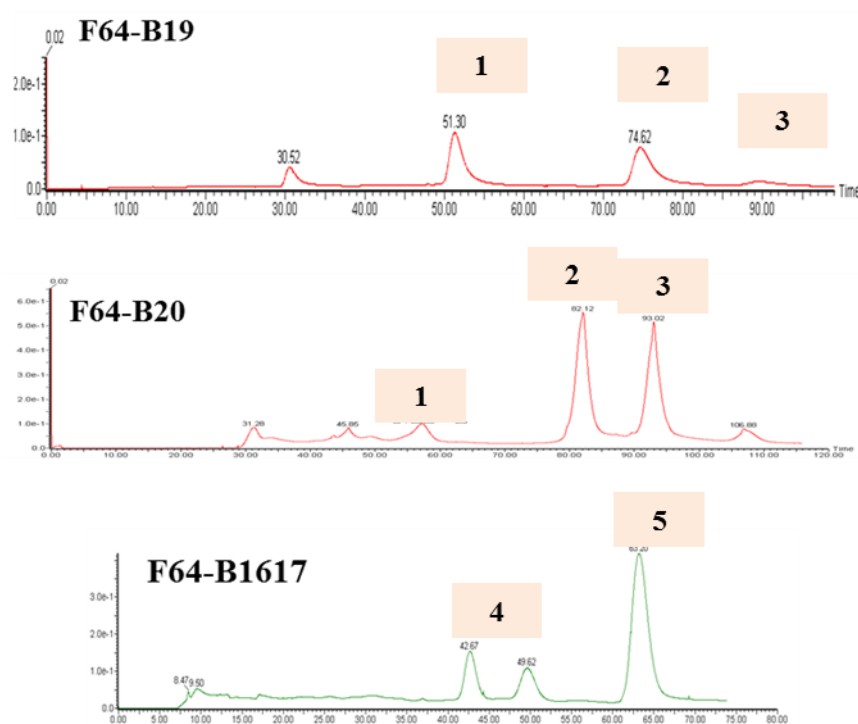

**Figure S1.** The chromatograms of preparative HPLC for fractions F64-B19, F64-B20 and F64-B1617 recorded at UV 210 nm.

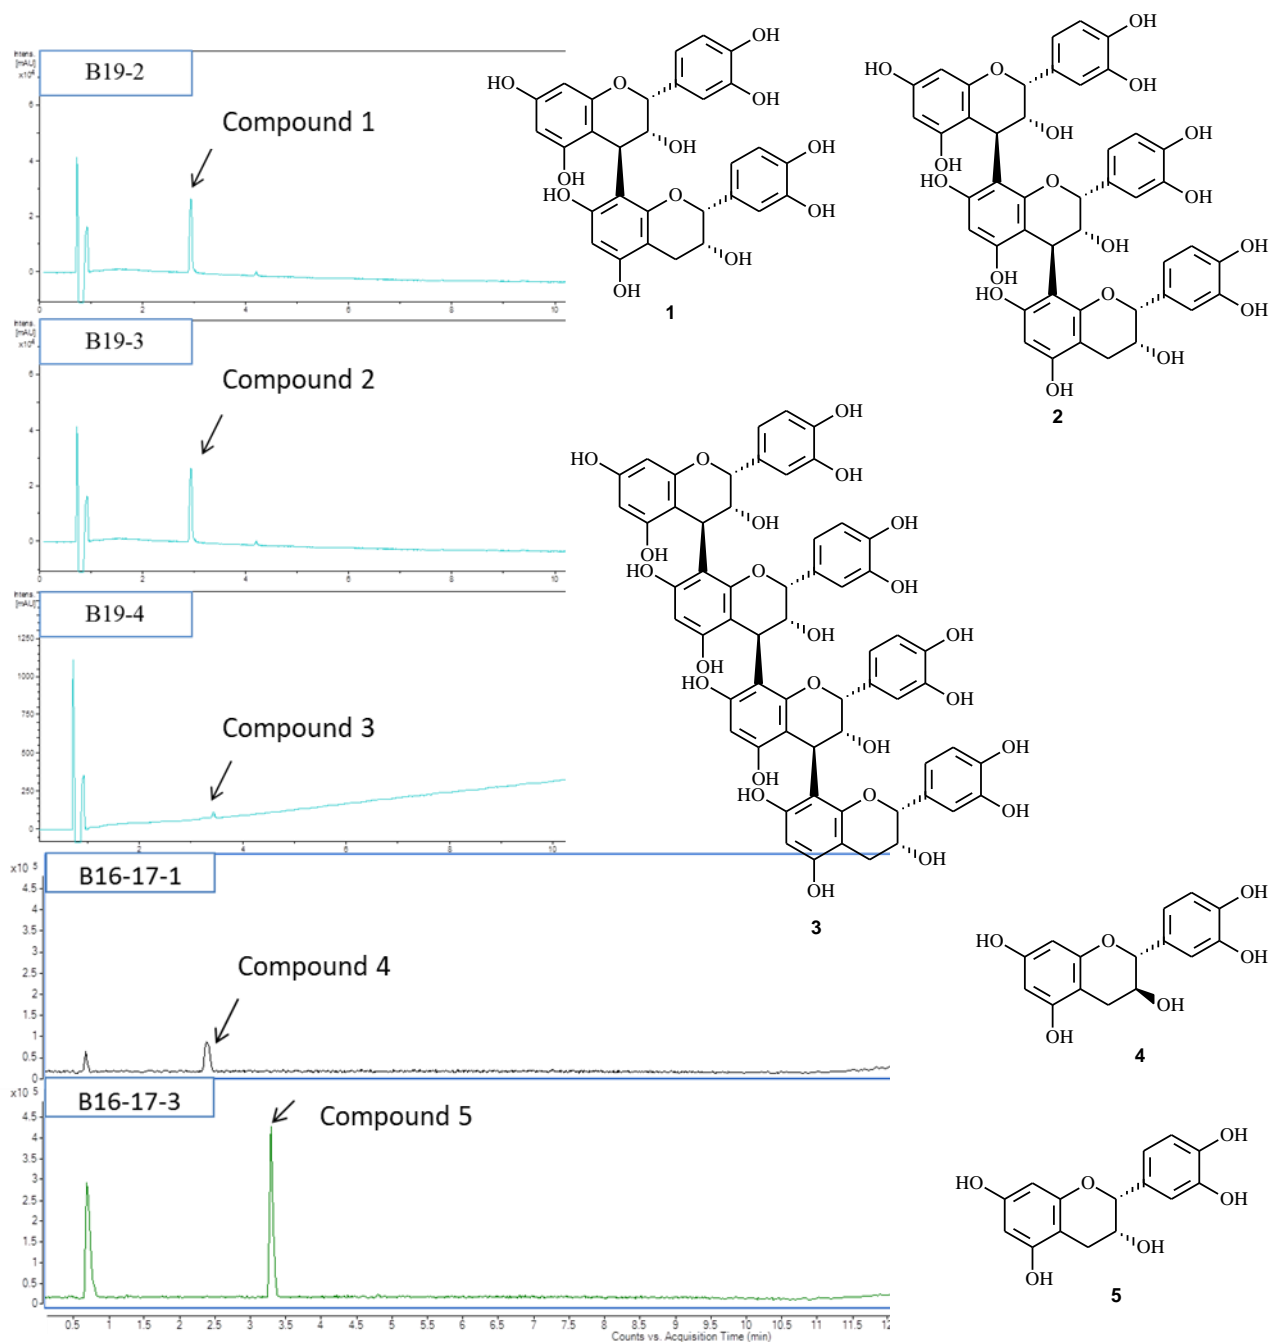

**Figure S2.** UPLC chromatograms of compounds **1-5** isolated from fractions B19 and B20 recorded at UV 210 nm.

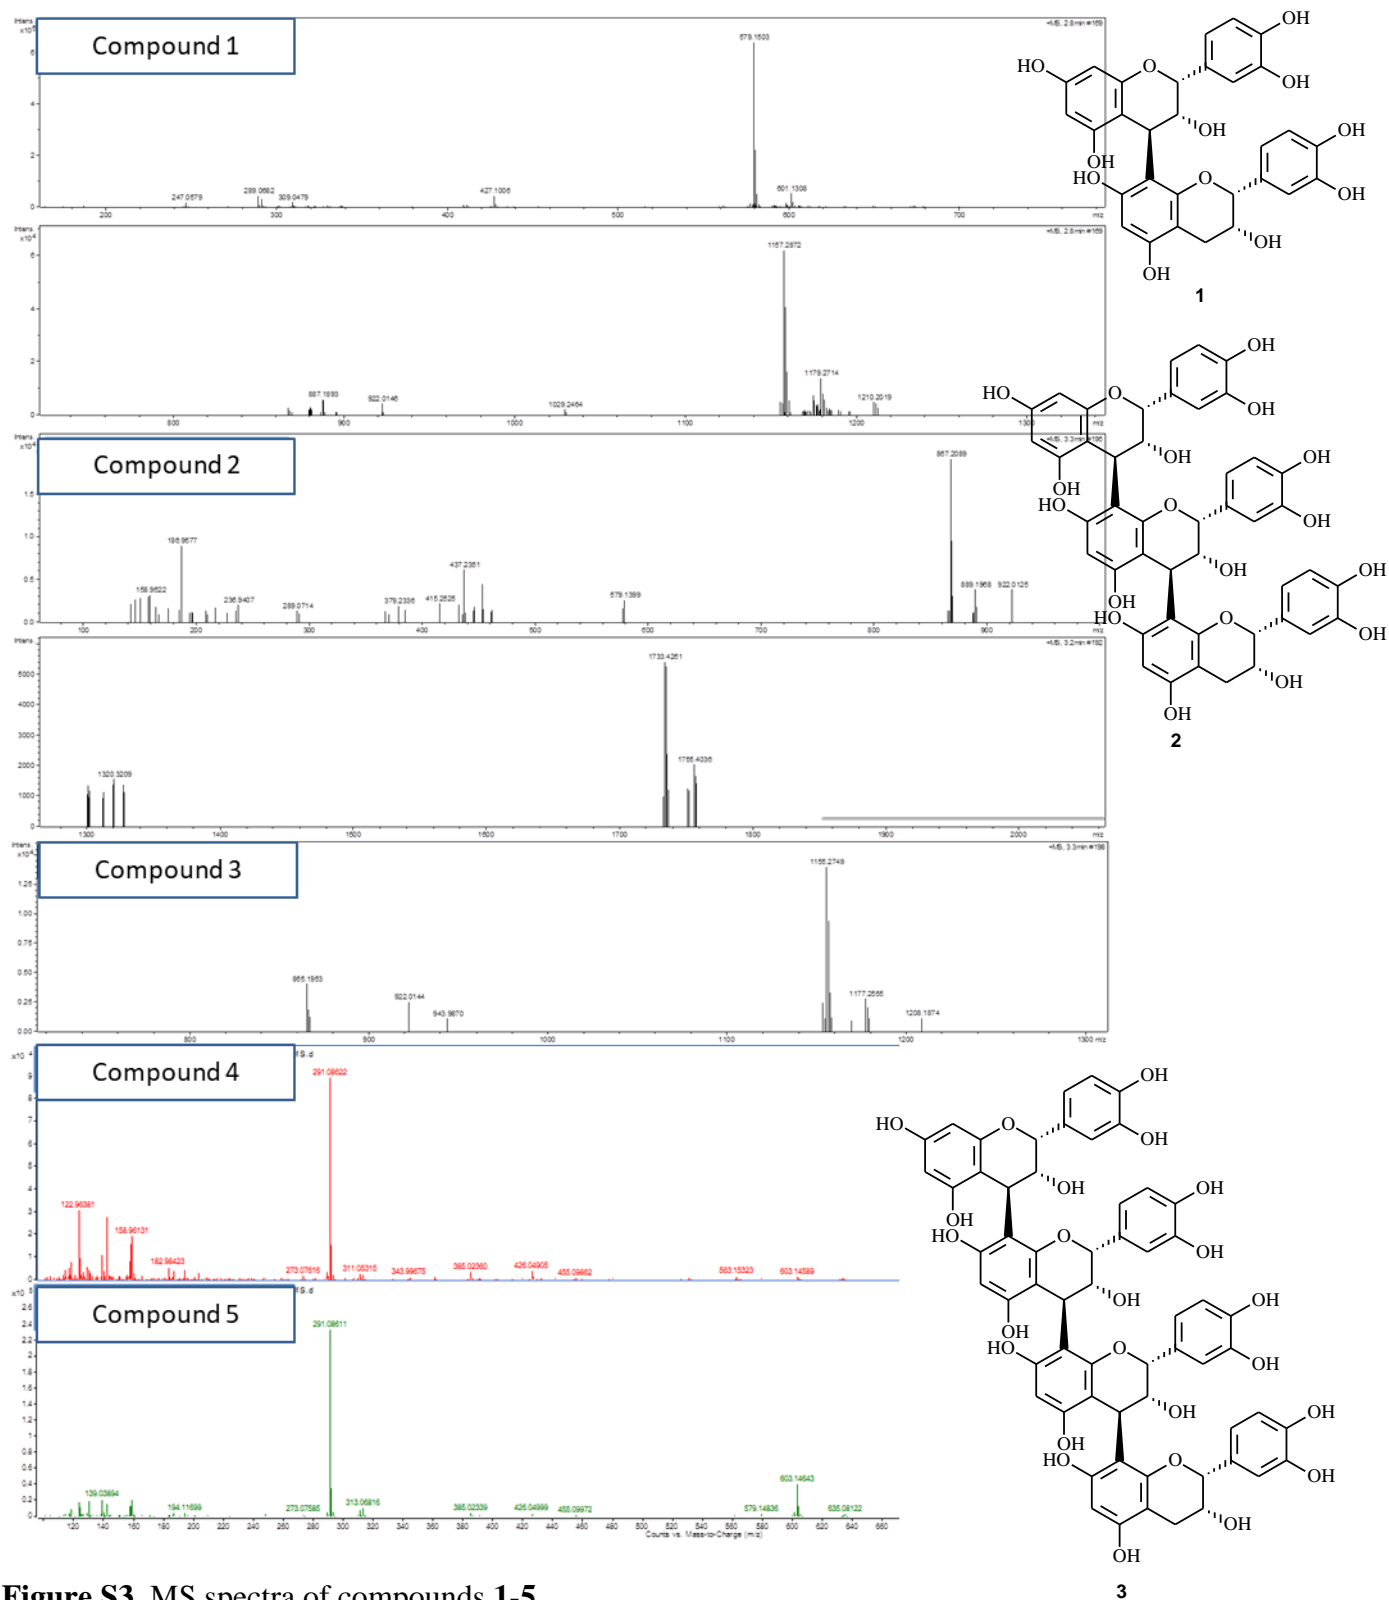

**Figure S3. MS spectra of compounds 1-5.**

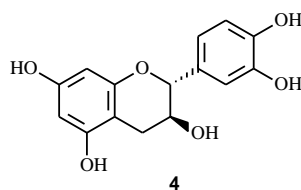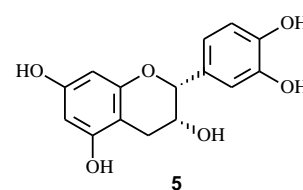

**Table S2.** Comparison of the MS data of **1-5** and their reported literature data.

|                          | Compound                                           | [M-H] <sup>-</sup> (m/z) | MS <sup>2</sup> (m/z)        |
|--------------------------|----------------------------------------------------|--------------------------|------------------------------|
| <b>Experimental data</b> | Compound <b>4</b>                                  | 289.0721                 | 245, 205, 179, 137, 125      |
|                          | Compound <b>5</b>                                  | 289.0723                 | 245, 205, 179, 161           |
|                          | Compound <b>1</b>                                  | 577.1322                 | 425, 407, 289                |
|                          | Compound <b>2</b>                                  | 865.1971                 | 713, 575, 289                |
|                          | Compound <b>3</b>                                  | 1153.2592                | 865, 575, 287                |
| <b>Literature data</b>   | Catechin ( <b>4</b> )/<br>Epicatechin ( <b>5</b> ) | 289.0702                 | 245, 205, 179, 161, 137, 125 |
|                          | Procyanidin B2 ( <b>1</b> )                        | 577.1370                 | 451, 425, 407, 289           |
|                          | Procyanidin C ( <b>2</b> )                         | 865.1                    | 713, 575, 425, 289           |
|                          | Proanthocyanidin tetramer ( <b>3</b> )             | 1153                     | 865, 577, 407, 423, 405      |

**References** of the literature data: catechin/epicatechin (Liu, G.-Q.; Dong, J.; Wang, H.; Wan, L.-R.; Hashi, Y.; Chen, S.-Z. ESI Ffragmentation studies of four tea catechins. *Chem. J. Chinese Univ.* **2009**, *30*, 1566–1570.), procyanidin B (Dugo, P.; Cacciola, F.; Herrero, M.; Donato, P.; Mondello, L. Use of partially porous column as second dimension in comprehensive two-dimensional system for analysis of polyphenolic antioxidants. *J. Sep. Sci.* **2008**, *31*, 3297–3308, doi:10.1002/jssc.200800281), procyanidin C (Delphine, C.; Sonia, C. Use of RP-HPLC-ESI(–)-MS/MS to differentiate various proanthocyanidin isomers in lager beer extracts. *J. Am. Soc. Brew. Chem.* **2008**, 0–6, doi:10.1094/ASBCJ-2008-0215-01) and procyanidin tetramer (Kiprovski, B.; Mikulic-Petkovsek, M.; Slatnar, A.; Veberic, R.; Stampar, F.; Malencic, D.; Latkovic, D. Comparison of phenolic profiles and antioxidant properties of European *Fagopyrum esculentum* cultivars. *Food Chem.* **2015**, *185*, 41–47, doi:10.1016/j.foodchem.2015.03.137).

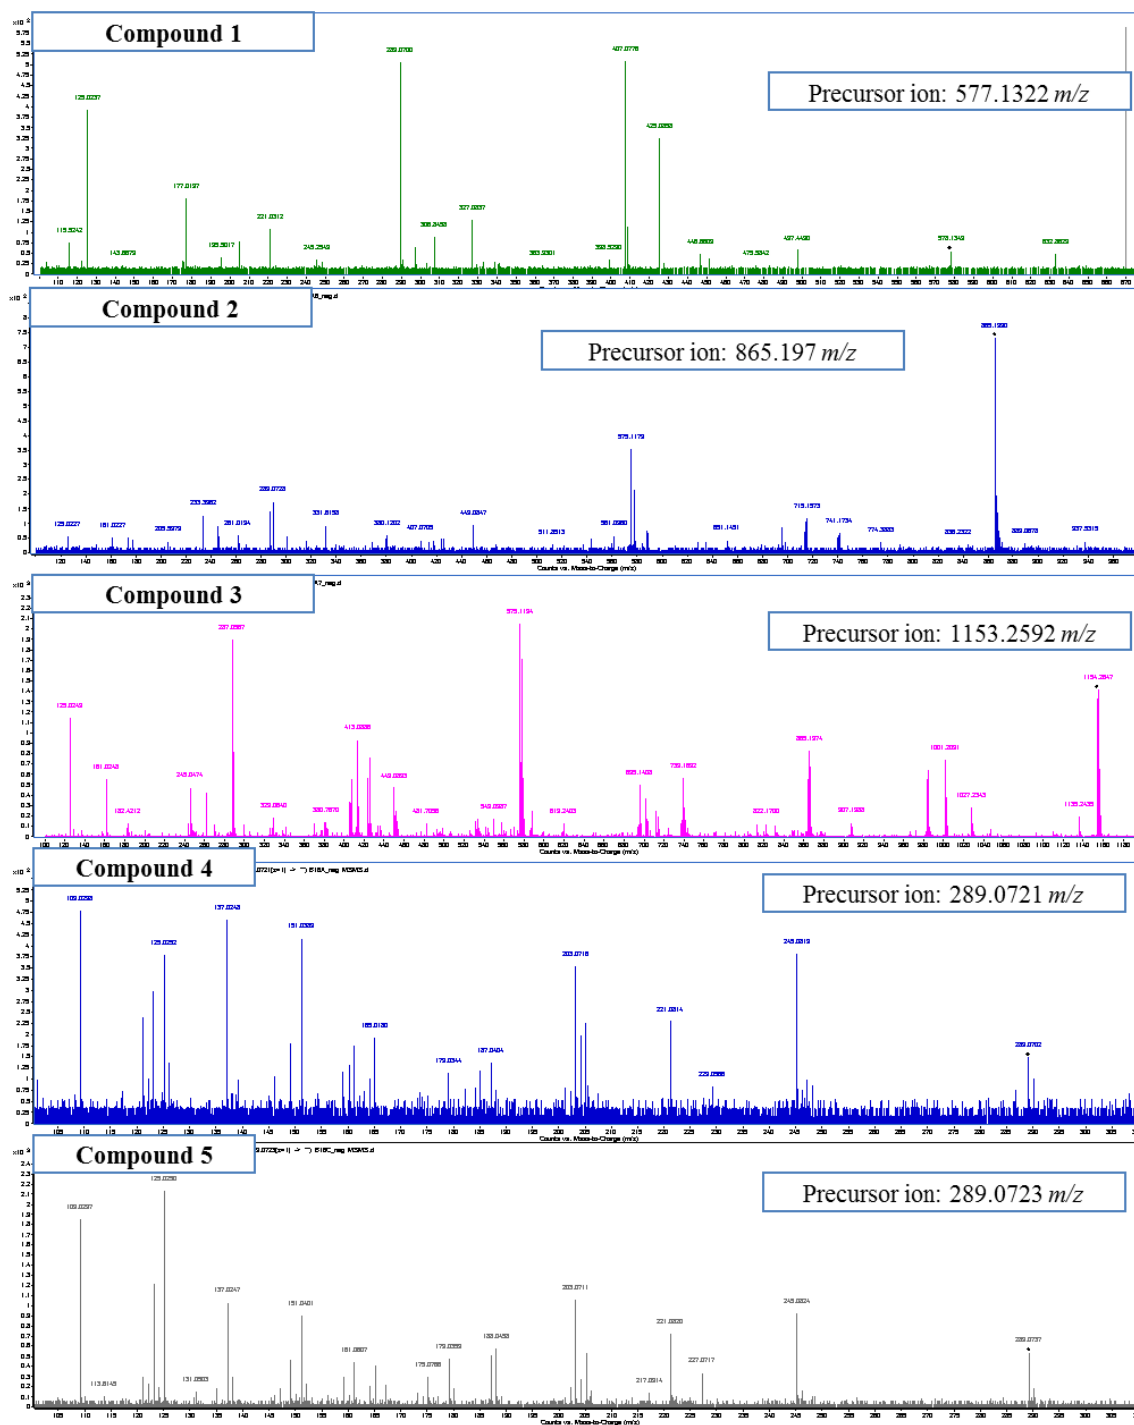

**Figure S4. MS<sup>2</sup> spectra of 1-5.**



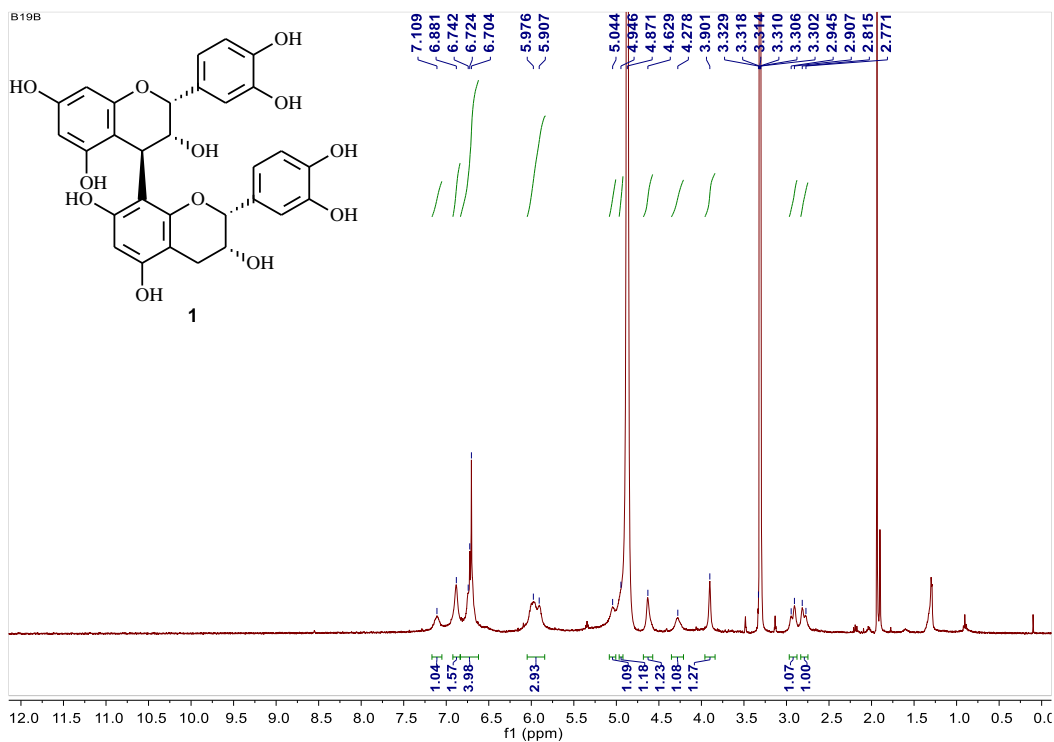

**Figure S5.**  $^1\text{H}$  NMR spectrum of **1** in  $\text{CD}_3\text{OD}$  (400 MHz).

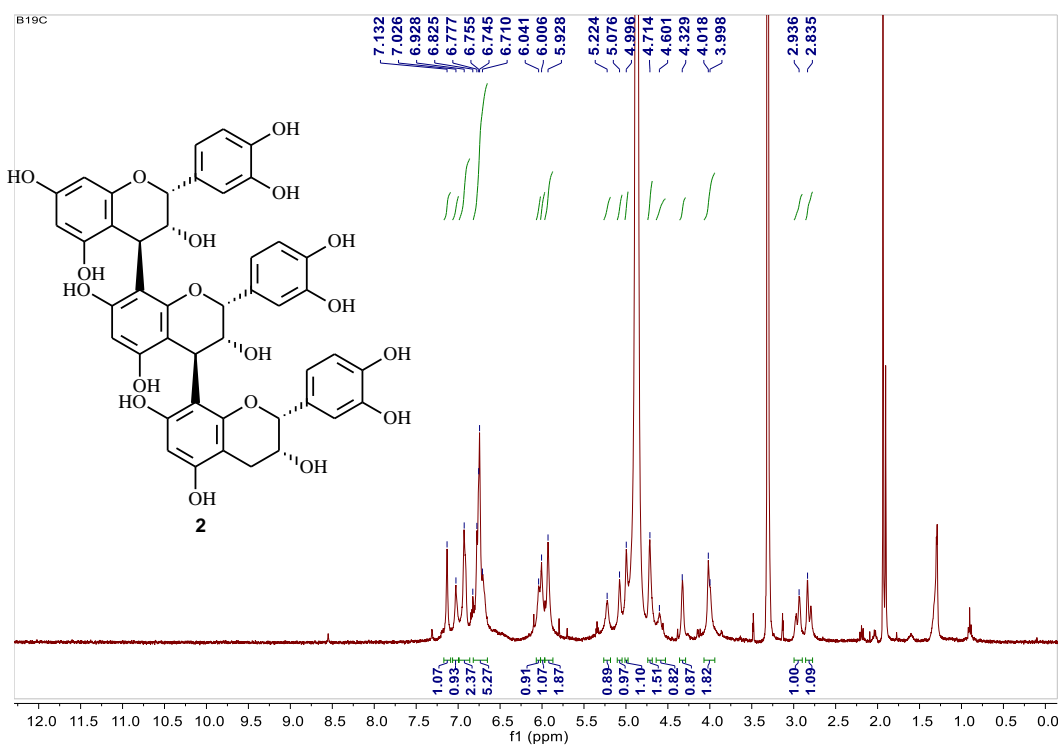

**Figure S6.**  $^1\text{H}$  NMR spectrum of **2** in  $\text{CD}_3\text{OD}$  (400 MHz).

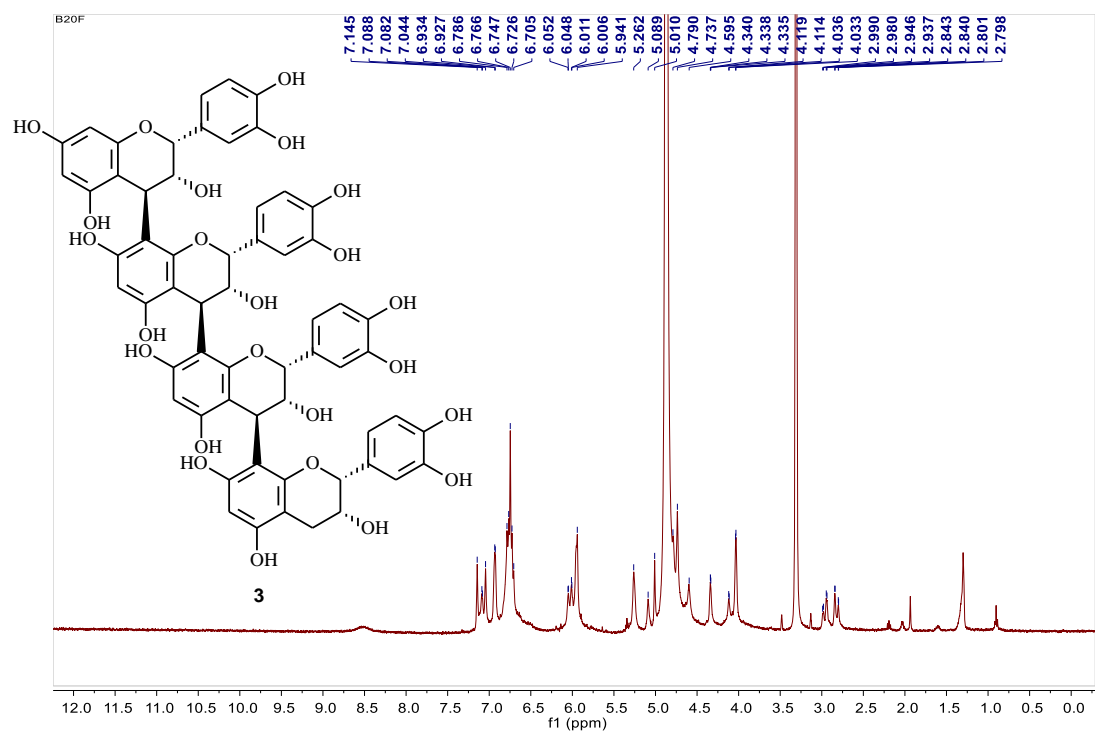

**Figure S7.**  $^1\text{H}$  NMR spectrum of **3** in  $\text{CD}_3\text{OD}$  (400 MHz).

**Table S3.** Comparison of <sup>1</sup>H NMR spectral data of the literature procyanidin B2 and compound 1.

|        |          | Procyanidin B2<br>(Reported by Shoji <i>et al.</i> ) <sup>a</sup> | Procyanidin B2<br>(Reported by Makabe <i>et al.</i> ) <sup>b</sup> | Compound 1                            |
|--------|----------|-------------------------------------------------------------------|--------------------------------------------------------------------|---------------------------------------|
|        | Position | δ <sub>H</sub> (J in Hz)                                          | δ <sub>H</sub> (J in Hz)                                           | δ <sub>H</sub> (J in Hz)              |
| A unit | 2        | 4.95 (br s)                                                       | 4.93 (m)                                                           | 4.95 (brs)                            |
|        | 3        | 4.24 (br t)                                                       | 4.09-4.27 (m)                                                      | 4.28 (brs)                            |
|        | 4        | 2.79 (d, 17)<br>2.94 (dd, 17, 4)                                  | 2.71-2.81 (m)<br>2.84-2.93 (m)                                     | 2.81 (d, 2.9)<br>2.91 (dd, 15.5, 3.5) |
|        | 6        | 5.88 (s)                                                          | 5.91-5.94 (m)                                                      | 5.94 (brs)                            |
|        | 2'       | 7.10 (d, 2)                                                       | 7.09 (br s)                                                        | 7.11 (brs)                            |
|        | 4'       | 6.72 (d, 8)                                                       | 6.70-6.81 (m)                                                      | 6.70 (dd, 7.7, 2.2)                   |
|        | 5'       | 6.85 (dd, 8, 2)                                                   | 6.70-6.81 (m)                                                      | 6.73 (d, 7.7)                         |
| B unit | 2        | 5.06 (br s)                                                       | 5.05 (m)                                                           | 5.04 (brs)                            |
|        | 3        | 3.79 (br s)                                                       | 3.91 (m)                                                           | 3.90 (brs)                            |
|        | 4        | 4.61 (br s)                                                       | 4.62 (br s)                                                        | 4.63 (brs)                            |
|        | 6        | 5.92 (d, 2)                                                       | 5.91-5.94 (m)                                                      | 5.94 (brs)                            |
|        | 8        | 5.94 (d, 2)                                                       | 5.91-5.94 (m)                                                      | 5.94 (brs)                            |
|        | 2'       | 6.83 (d, 2)                                                       | 6.89 (br s)                                                        | 6.88 (d, 2.2)                         |
|        | 4'       | 6.68 (d, 8)                                                       | 6.70-6.81 (m)                                                      | 6.70 (dd, 7.7, 2.2)                   |
|        | 5'       | 6.60 (dd, 8, 2)                                                   | 6.70-6.81 (m)                                                      | 6.73 (d, 7.7)                         |

<sup>a</sup>Shoji, T.; Mutsuga, M.; Nakamura, T.; Kanda, T.; Akiyama, H.; Goda, Y. Isolation and structural elucidation of some procyanidins from apple by low-temperature nuclear magnetic resonance. *J. Agric. Food Chem.* **2003**, *51*, 3806–3813, doi:10.1021/jf0300184.

<sup>b</sup>Makabe, H.; Kamo, T.; Hirota, M.; Mohri, Y.; Sagehashi, M.; Yamada, T.; Hattori, Y.; Morimura, K. An Efficient Synthesis of Procyanidins Using Equimolar Condensation of Catechin and/or Epicatechin Catalyzed by Ytterbium Triflate. *Heterocycles* **2009**, *79*, 549, doi:10.3987/COM-08-S(D)14.

**Table S4.** Comparison of  $^1\text{H}$  NMR spectral data of the literature procyanidin C1 and compound **2**.

|        |          | Procyanidin PC1<br>(Reported by Shoji <i>et al.</i> ) <sup>a</sup> | <b>2</b>                               |
|--------|----------|--------------------------------------------------------------------|----------------------------------------|
|        | Position | $\delta_{\text{H}}$ ( <i>J</i> in Hz)                              | $\delta_{\text{H}}$ ( <i>J</i> in Hz)  |
| A unit | 2        | 4.98 (br s)                                                        | 5.00 (brs)                             |
|        | 3        | 4.31 (br s)                                                        | 4.33 (s)                               |
|        | 4        | 2.81 (d, 16)<br>2.94 (dd, 4, 16)                                   | 2.83 (d, 16.0)<br>2.94 (dd, 16.0, 4.3) |
|        | 6        | 5.92 (s)                                                           | 5.93 (s)                               |
|        | 2'       | 7.11 (d, 2)                                                        | 7.13 (brs)                             |
|        | 4'       | 6.74 (d, 8)                                                        | 6.71 (dd, 8.1, 2.1)                    |
|        | 5'       | 6.88                                                               | 6.93 (d, 8.1)                          |
| B unit | 2        | 5.23 (br s)                                                        | 5.22 (brs)                             |
|        | 3        | 3.94 (br s)                                                        | 4.01 (d, 8.1)                          |
|        | 4        | 4.68 (br s)                                                        | 4.71 (d, 8.8)                          |
|        | 6        | 5.88 (s)                                                           | 5.93 (s)                               |
|        | 2'       | 7.02 (d, 8)                                                        | 7.03 (brs)                             |
|        | 4'       | 6.71                                                               | 6.77 (dd, 8.1, 2.0)                    |
|        | 5'       | 6.67 (d, 2)                                                        | 6.74 (d, 8.0)                          |
| C unit | 2        | 5.06 (br s)                                                        | 5.08 (brs)                             |
|        | 3        | 3.97 (br s)                                                        | 4.01 (d, 8.1)                          |
|        | 4        | 4.68 (br s)                                                        | 4.60 (brs)                             |
|        | 6        | 5.97 (d, 2)                                                        | 6.01 (d, 1.9)                          |
|        | 8        | 6.00 (d, 2)                                                        | 6.04 (brs)                             |
|        | 2'       | 6.89 (d, 2)                                                        | 6.92 (d, 2.0 Hz)                       |
|        | 4'       | 6.72                                                               | 6.77 (dd, 8.1, 2.0)                    |
|        | 5'       | 6.69                                                               | 6.74 (d, 8.0)                          |

<sup>a</sup>Shoji, T.; Mutsuga, M.; Nakamura, T.; Kanda, T.; Akiyama, H.; Goda, Y. Isolation and structural elucidation of some procyanidins from apple by low-temperature nuclear magnetic resonance. *J. Agric. Food Chem.* **2003**, *51*, 3806–3813, doi:10.1021/jf0300184.

**Table S5.** Comparison of  $^1\text{H}$  NMR spectral data of the literature procyanidin tetramer epicatechin-(4 $\beta$ →8)-epicatechin-(4 $\beta$ →8)-epicatechin-(4  $\beta$ →8)-epicatechin and compound **3**.

|        |          | Procyanidin Tetramer 11 (Reported by Shoji <i>et al.</i> ) <sup>a</sup> | <b>3</b>                               |
|--------|----------|-------------------------------------------------------------------------|----------------------------------------|
|        | Position | $\delta_{\text{H}}$ ( <i>J</i> in Hz)                                   | $\delta_{\text{H}}$ ( <i>J</i> in Hz)  |
| A unit | 2        | 5.00 (br s)                                                             | 5.01 (brs)                             |
|        | 3        | 4.32 (br t)                                                             | 4.34 (brs)                             |
|        | 4        | 2.81 (d, 17)<br>2.96 (dd, 4, 17)                                        | 2.84 (dd, 17.0<br>2.95 (dd, 17.0, 3.7) |
|        | 6        | 5.94 (s)                                                                | 5.94 (brs)                             |
|        | 2'       | 7.13 (d, 2)                                                             | 7.14 (brs)                             |
|        | 4'       | 6.75 (d, 8)                                                             | 6.78 (dd, 8.3, 2.3)                    |
|        | 5'       | 6.91                                                                    | 6.93 (brs)                             |
| B unit | 2        | 5.29 (br s)                                                             | 5.26 (brs)                             |
|        | 3        | 3.97 (d, 2)                                                             | 4.03 (brs)                             |
|        | 4        | 4.71 (br s)                                                             | 4.74 (brs)                             |
|        | 6        | 5.95 (s)                                                                | 5.94 (brs)                             |
|        | 2'       | 7.03 (d, 2)                                                             | 7.04 (brs)                             |
|        | 4'       | 6.69 (d, 8)                                                             | 6.74 (d, 8.3)                          |
|        | 5'       | 6.75                                                                    | 6.74 (d, 8.3)                          |
| C unit | 2        | 5.26 (br s)                                                             | 5.26 (brs)                             |
|        | 3        | 4.08 (d, 2)                                                             | 4.12 (brs)                             |
|        | 4        | 4.75 (br s)                                                             | 4.74 (brs)                             |
|        | 6        | 5.93 (s)                                                                | 5.94 (brs)                             |
|        | 2'       | 7.09 (d, 2)                                                             | 7.09 (brs)                             |
|        | 4'       | 6.73 (d, 8)                                                             | 6.78 (dd, 8.3, 2.3)                    |
|        | 5'       | 6.78                                                                    | 6.74 (d, 8.3)                          |
| D unit | 2        | 5.09 (br s)                                                             | 5.09 (brs)                             |
|        | 3        | 3.99 (d, 2)                                                             | 4.03 (brs)                             |
|        | 4        | 4.72 (br s)                                                             | 4.79 (brs)                             |
|        | 6        | 5.98 (d, 2)                                                             | 6.01 (brs)                             |
|        | 8        | 6.01 (d, 2)                                                             | 6.05 (brs)                             |
|        | 2'       | 6.91 (d, 2)                                                             | 6.93 (brs)                             |
|        | 4'       | 6.74 (d, 8)                                                             | 6.78 (dd, 8.3, 2.3)                    |
|        | 5'       | 6.70                                                                    | 6.71 (d, 8.3)                          |

<sup>a</sup>Shoji, T.; Mutsuga, M.; Nakamura, T.; Kanda, T.; Akiyama, H.; Goda, Y. Isolation and structural elucidation of some procyanidins from apple by low-temperature nuclear magnetic resonance. *J. Agric. Food Chem.* **2003**, *51*, 3806–3813, doi:10.1021/jf0300184.

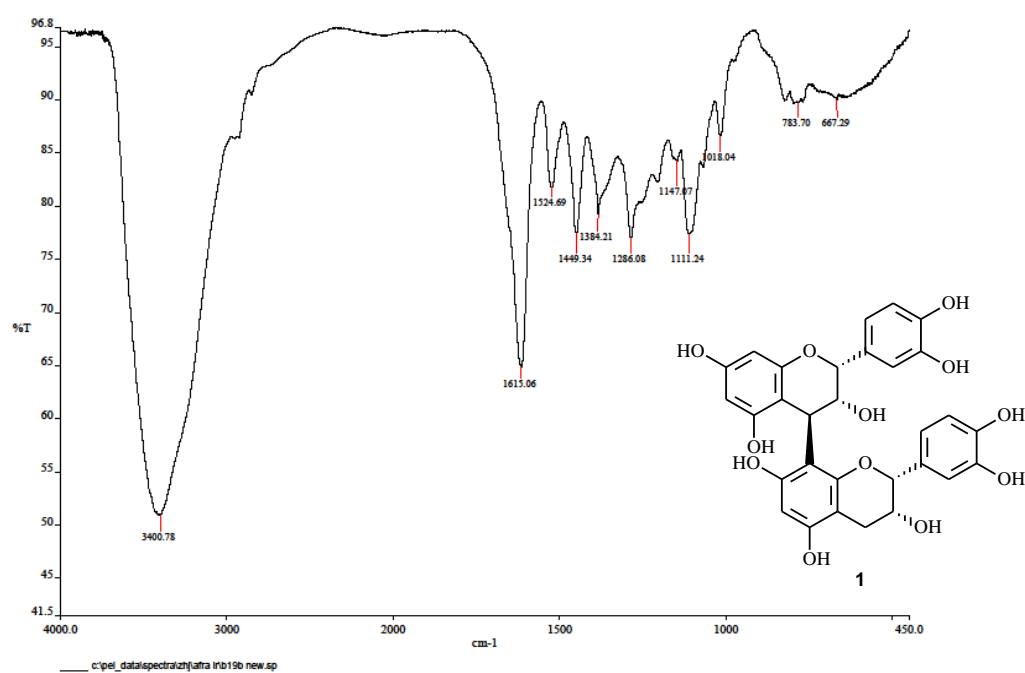

Figure S8. IR spectrum of 1.

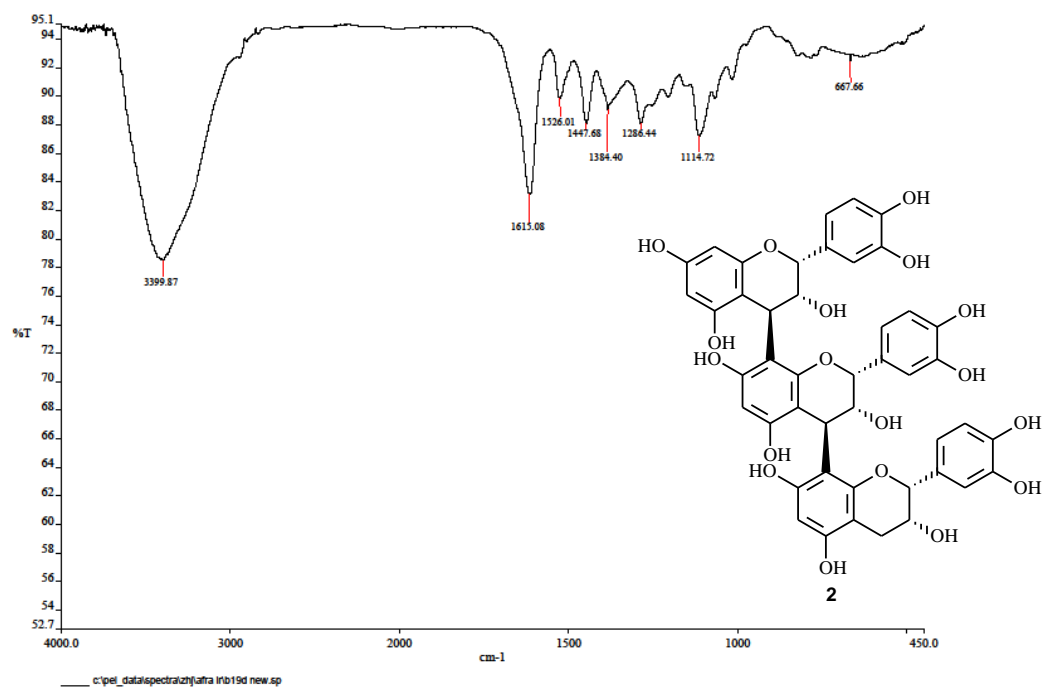

Figure S9. IR spectrum of 2.

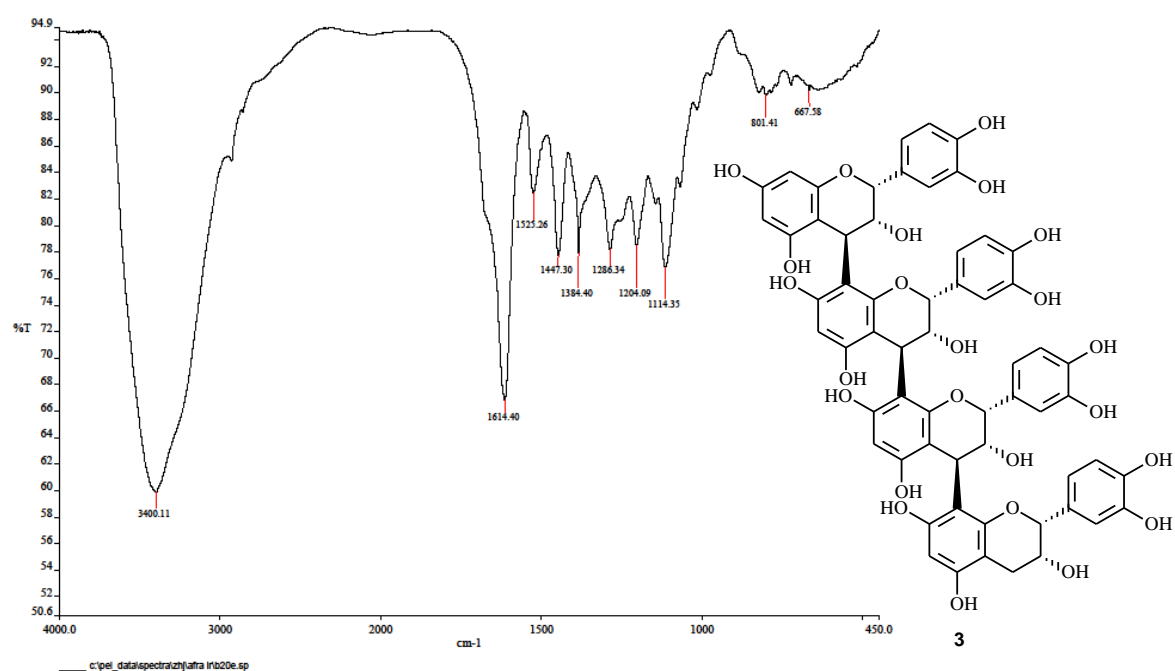

Figure S10. IR spectrum of 3.

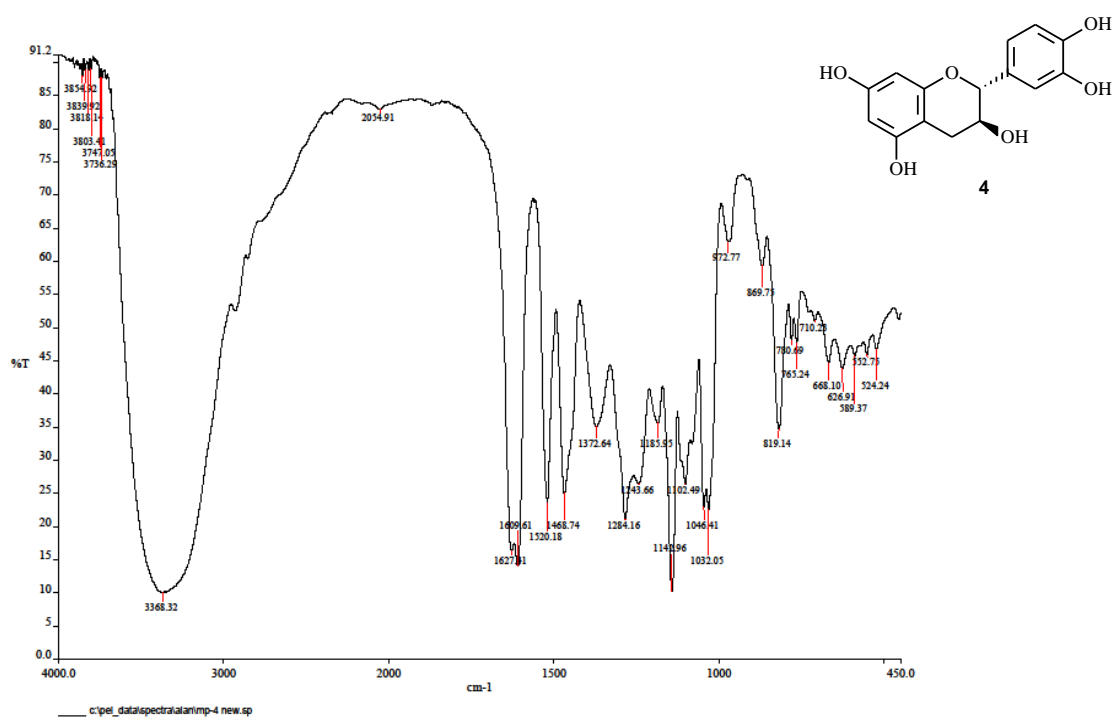

Figure S11. IR spectrum of 4.

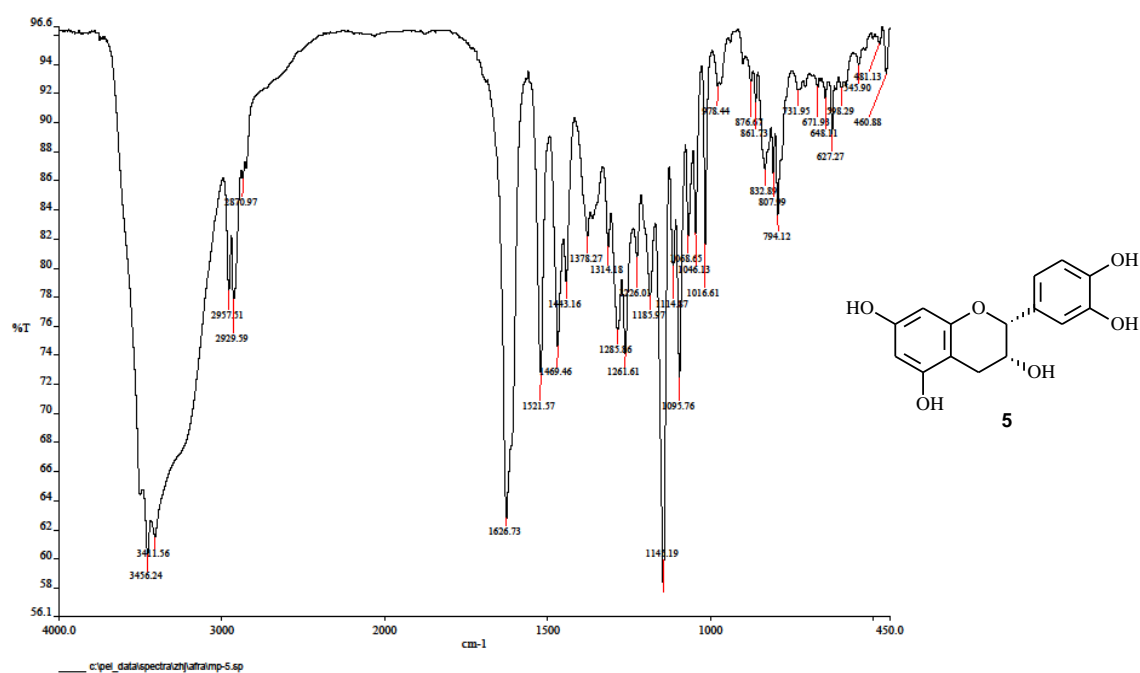

**Figure S12.** IR spectrum of **5**.



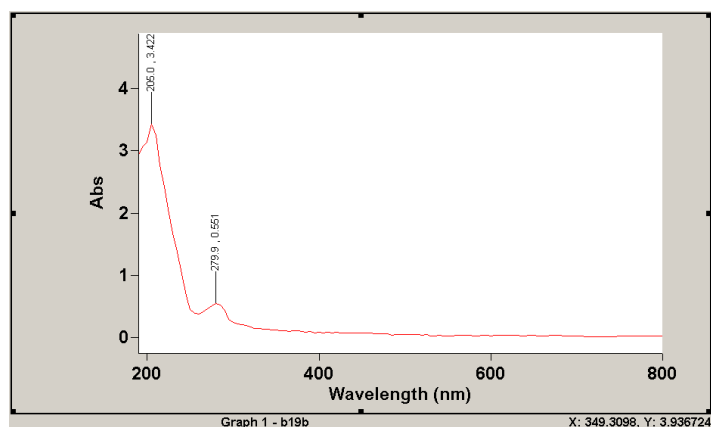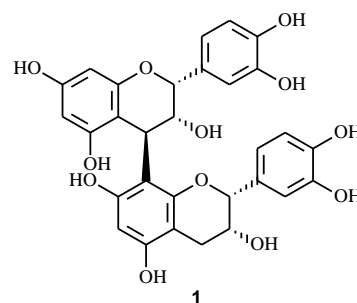

Figure S13. UV spectrum of 1.

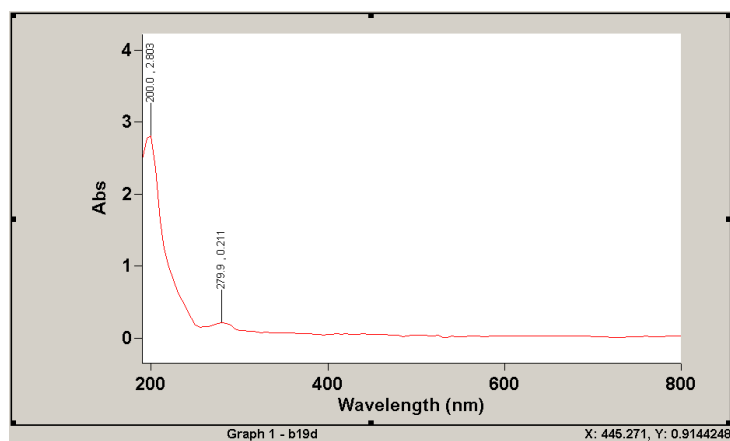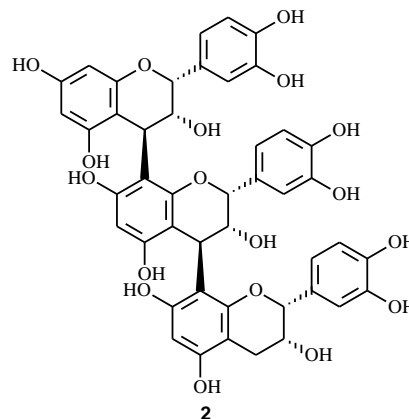

Figure S14. UV spectrum of 2.

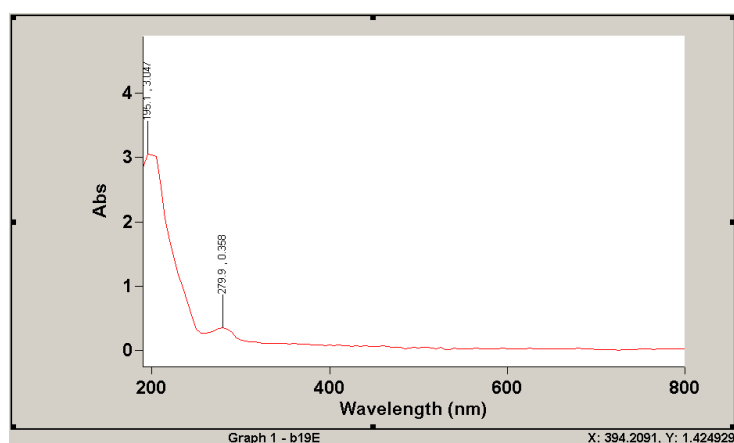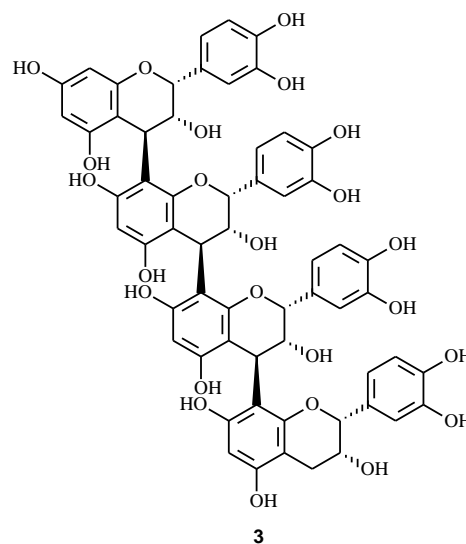

Figure S15. UV spectrum of 3.

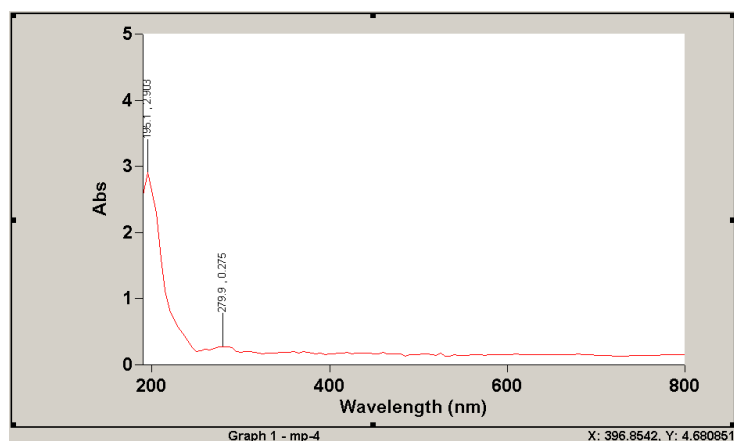

**Figure S16.** UV spectrum of **4**.

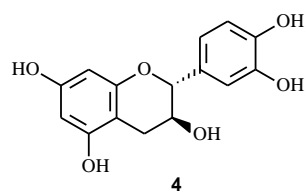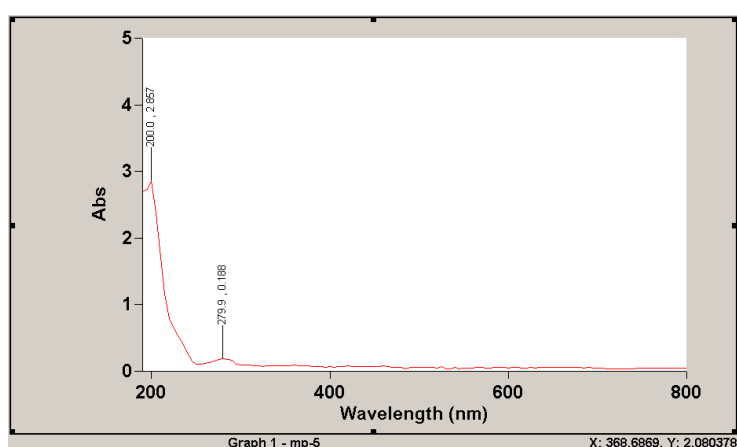

**Figure S17.** UV spectrum of **5**.

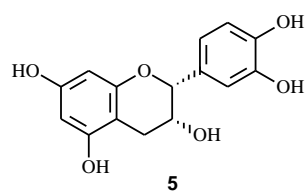

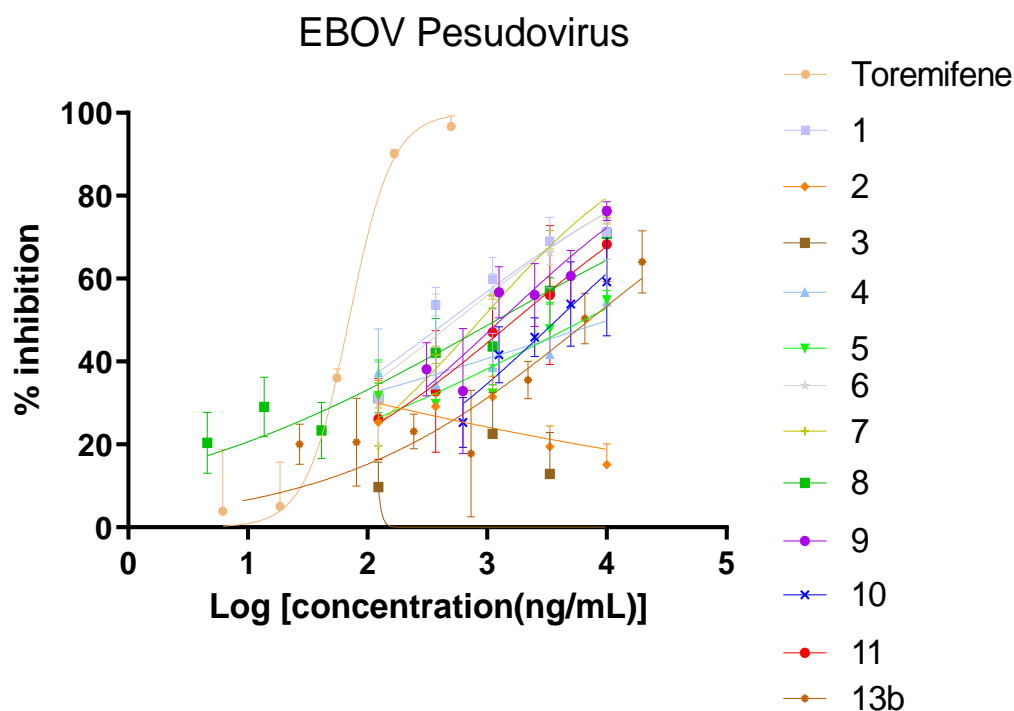

**Figure S18.** *In vitro* dose-response curves of plant extract fractions, flavan-3-ols and their derivatives on pseudovirion HIV-Luc/EBOV-GP. Samples were evaluated in A549 cells against pseudovirion HIV-Luc/EBOV-GP. The IC<sub>50</sub> values were calculated by four-parameter dose-response curve-fitting in GraphPad.

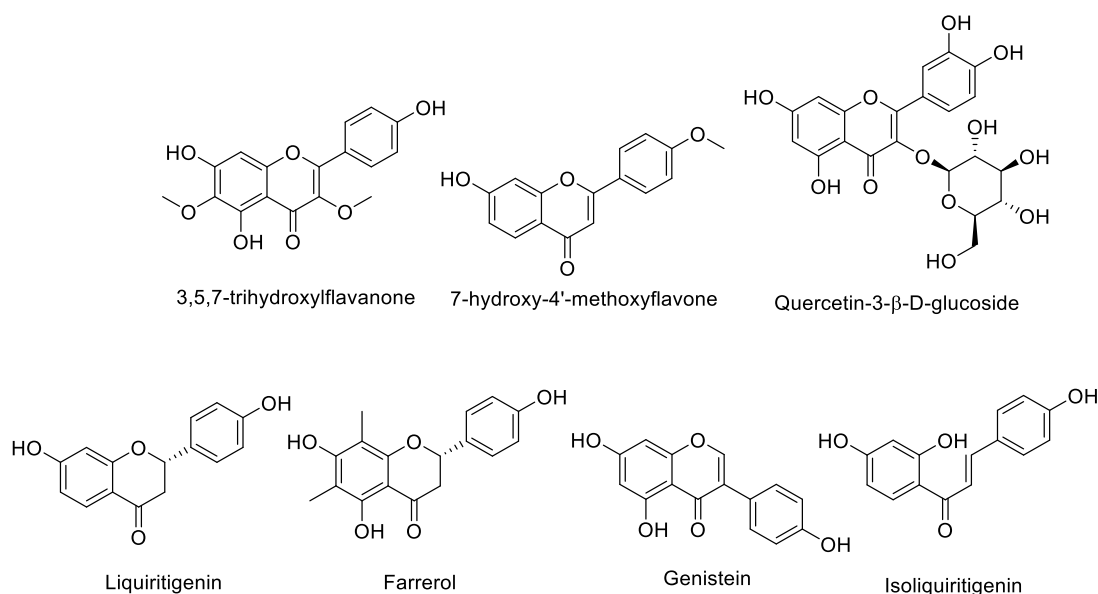

**Figure S19.** Chemical structures of flavanones showing no inhibitory effects against EBOV pseudovirus at concentrations of 50  $\mu$ M.

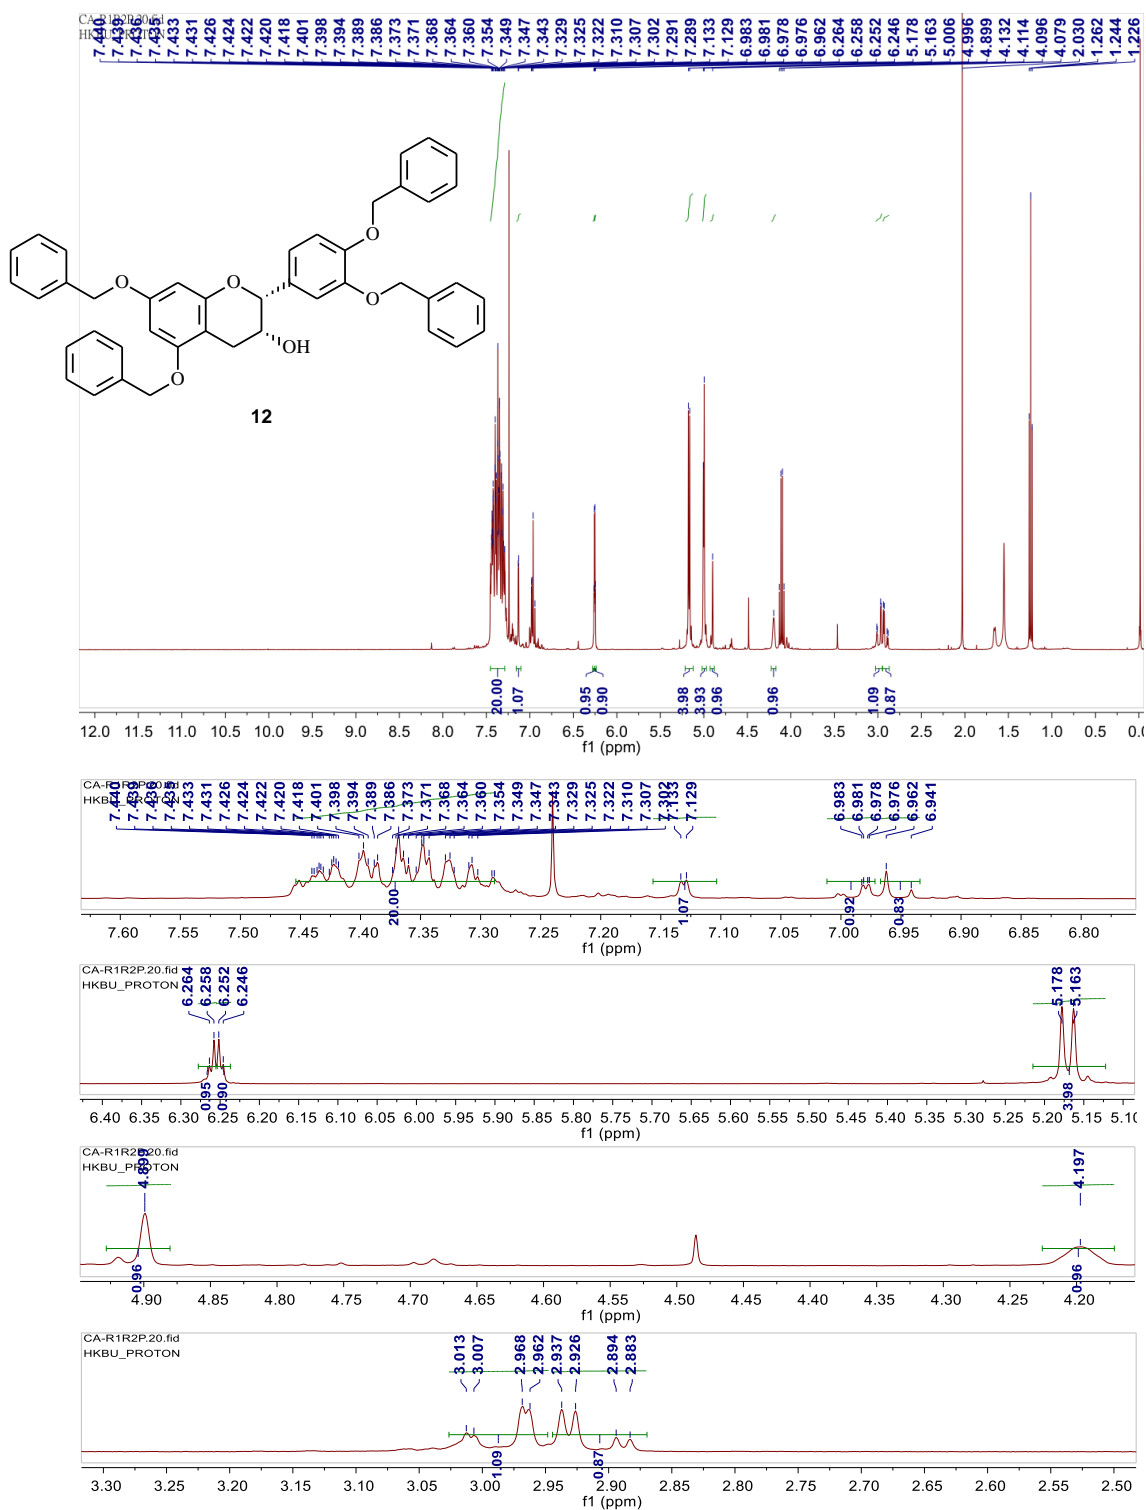

**Figure S20.** <sup>1</sup>H NMR spectrum of **12** in CDCl<sub>3</sub> (400 MHz).





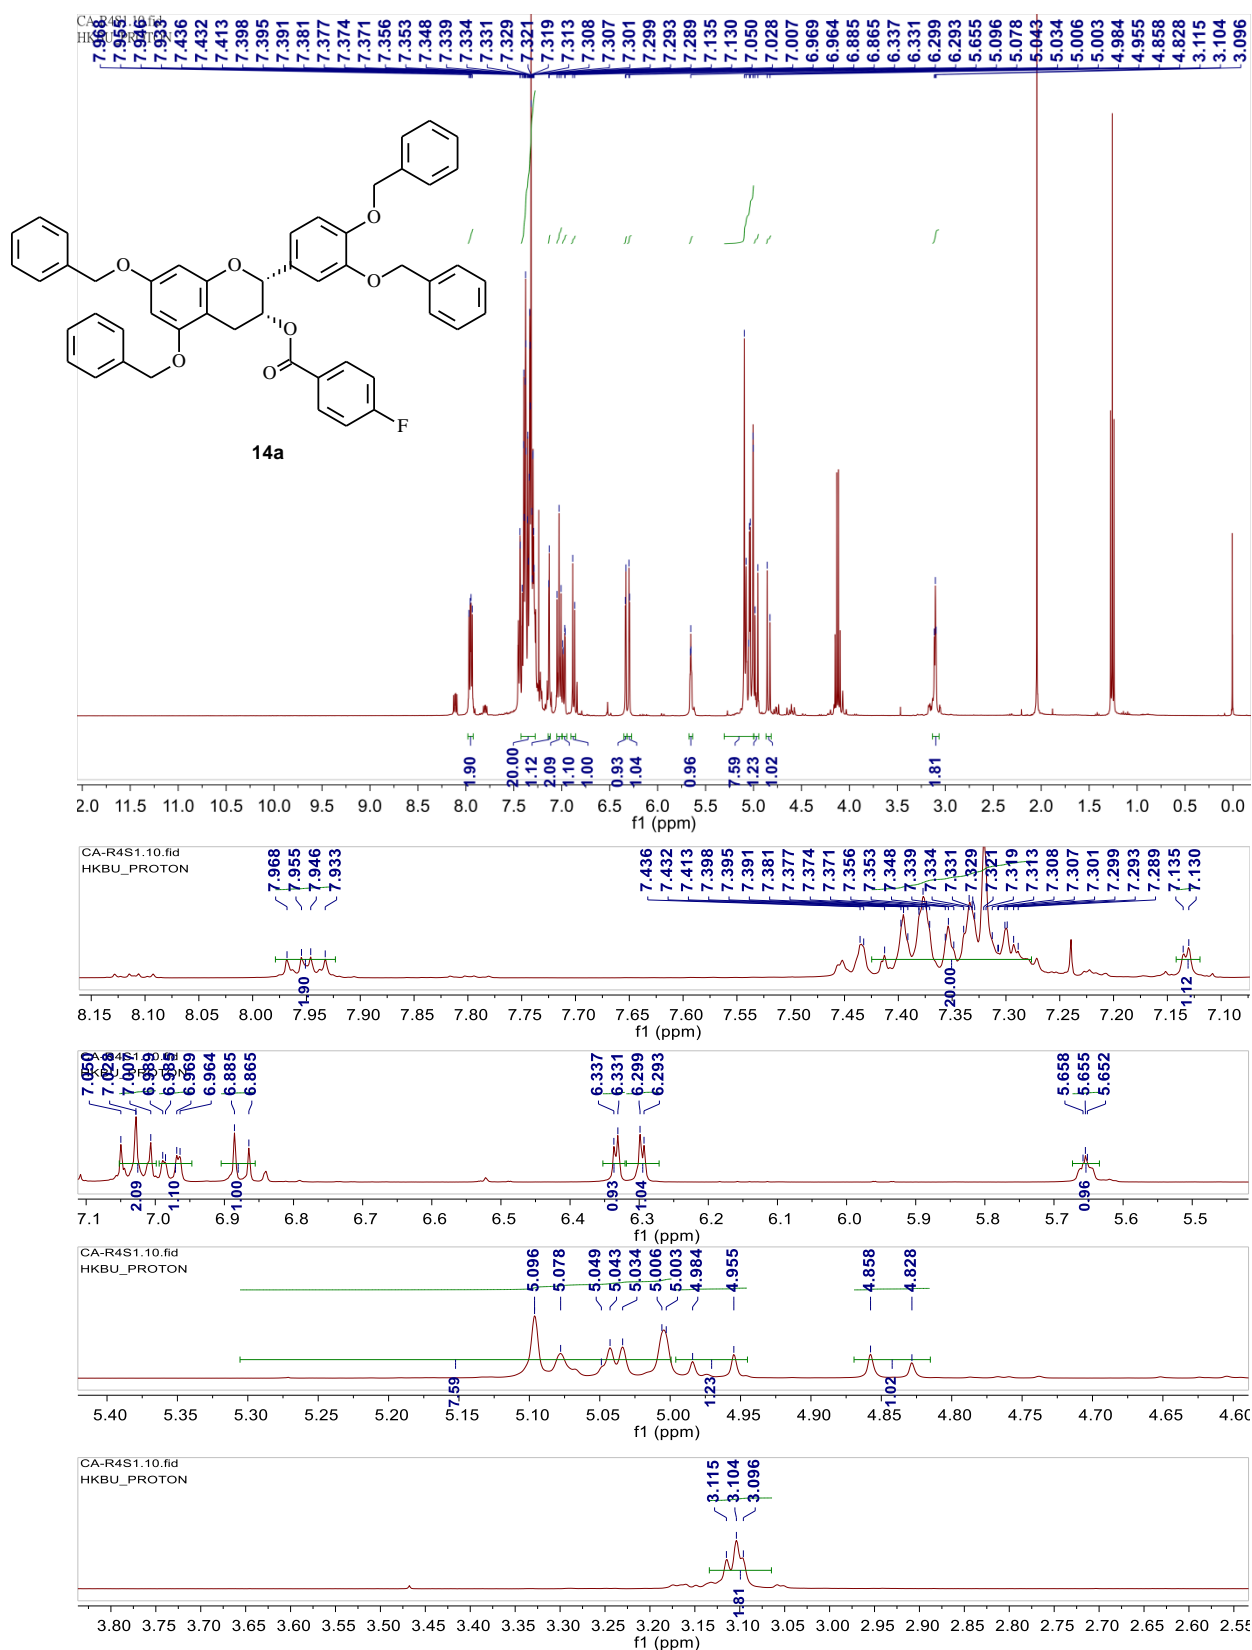

**Figure S23.** <sup>1</sup>H NMR spectrum of **14a** in CDCl<sub>3</sub> (400 MHz).

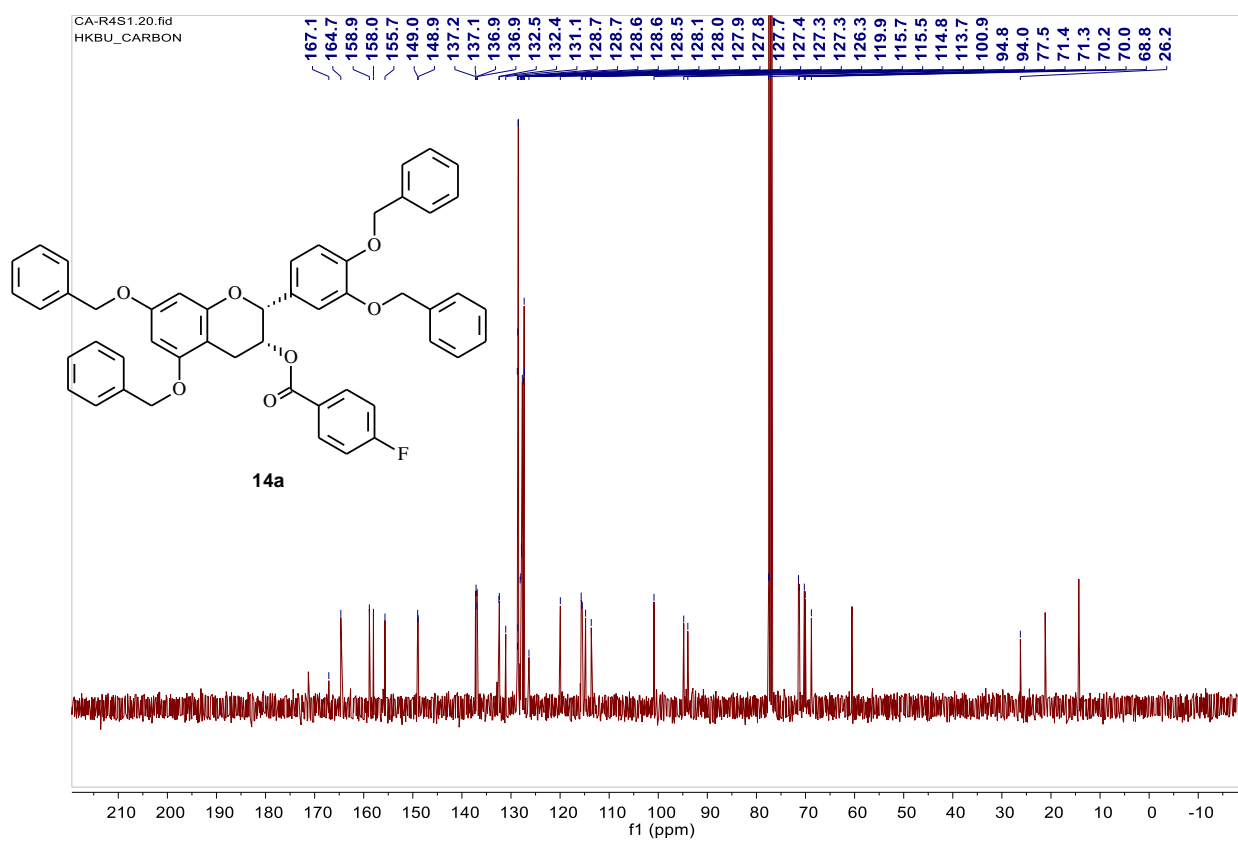

**Figure S24.**  $^{13}\text{C}$  NMR spectrum of **14a** in  $\text{CDCl}_3$  (100 MHz).



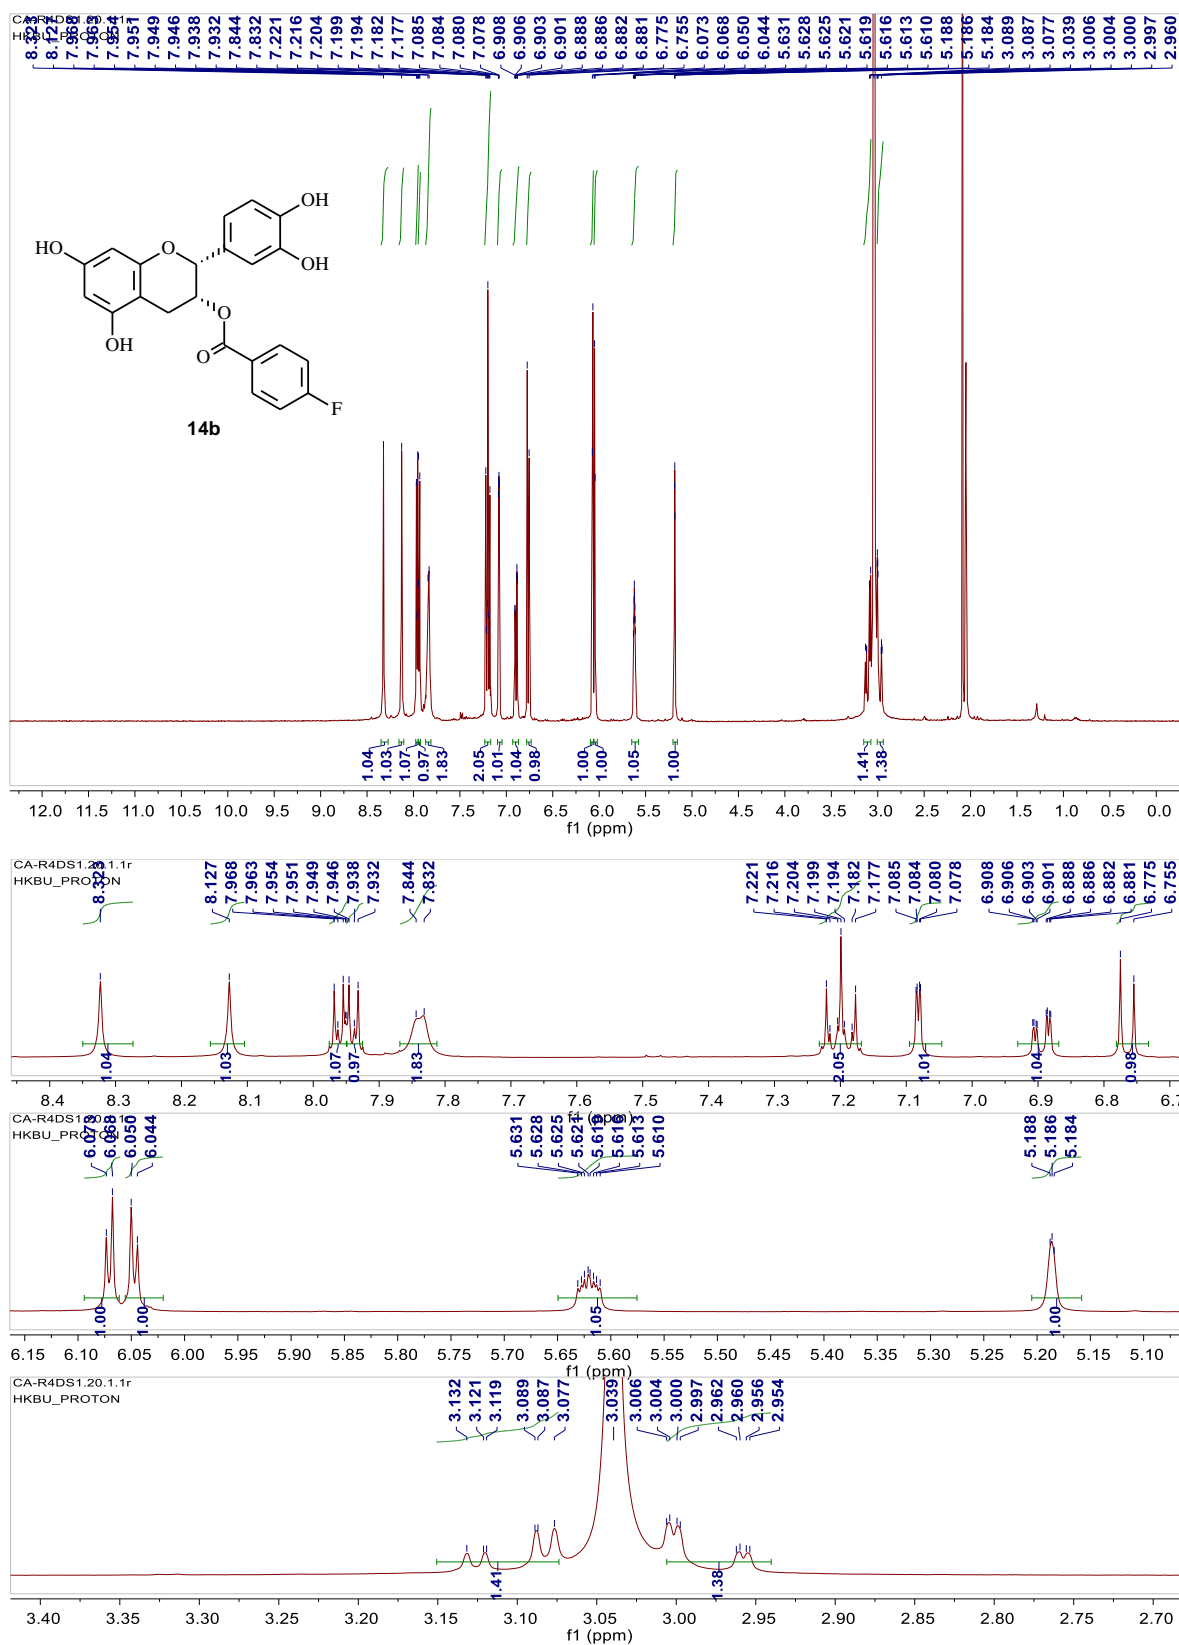

**Figure S25.** <sup>1</sup>H NMR spectrum of **14b** in acetone-d<sub>6</sub> (400 MHz).

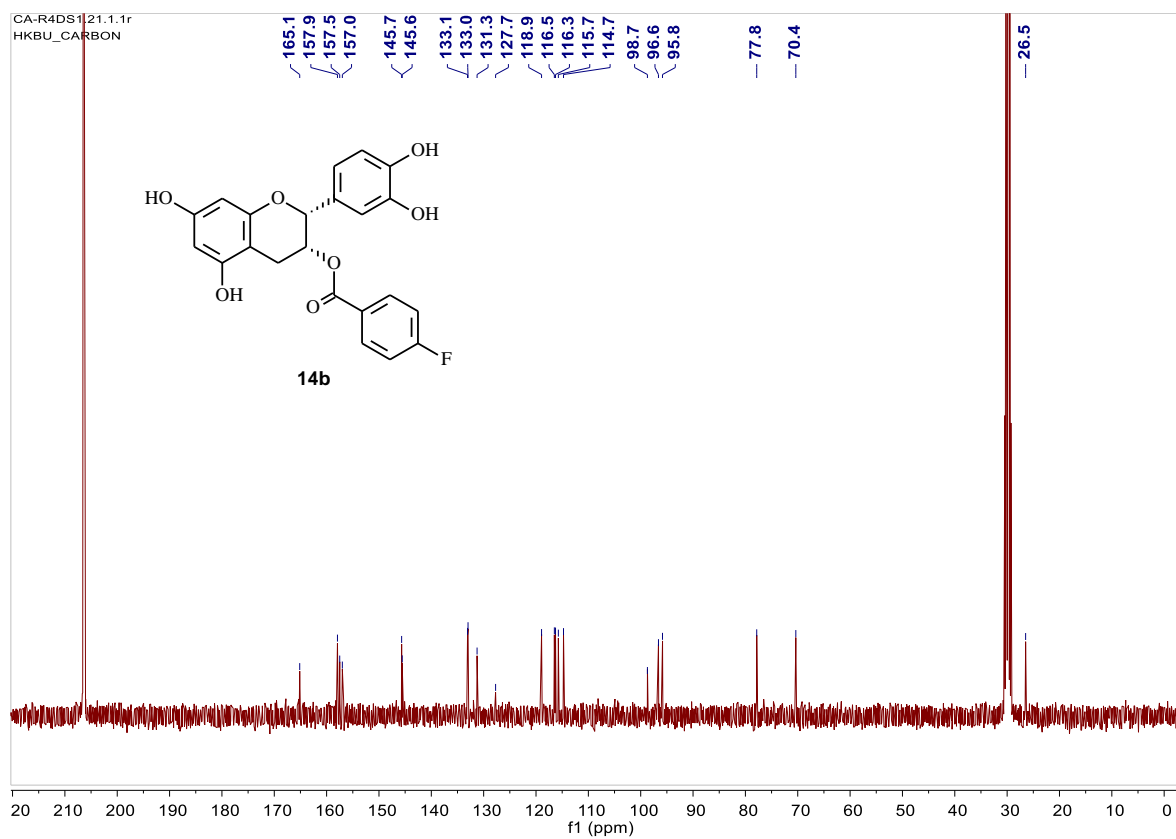

**Figure S26.**  $^{13}\text{C}$  NMR spectrum of **14b** in acetone- $\text{d}_6$  (100 MHz).

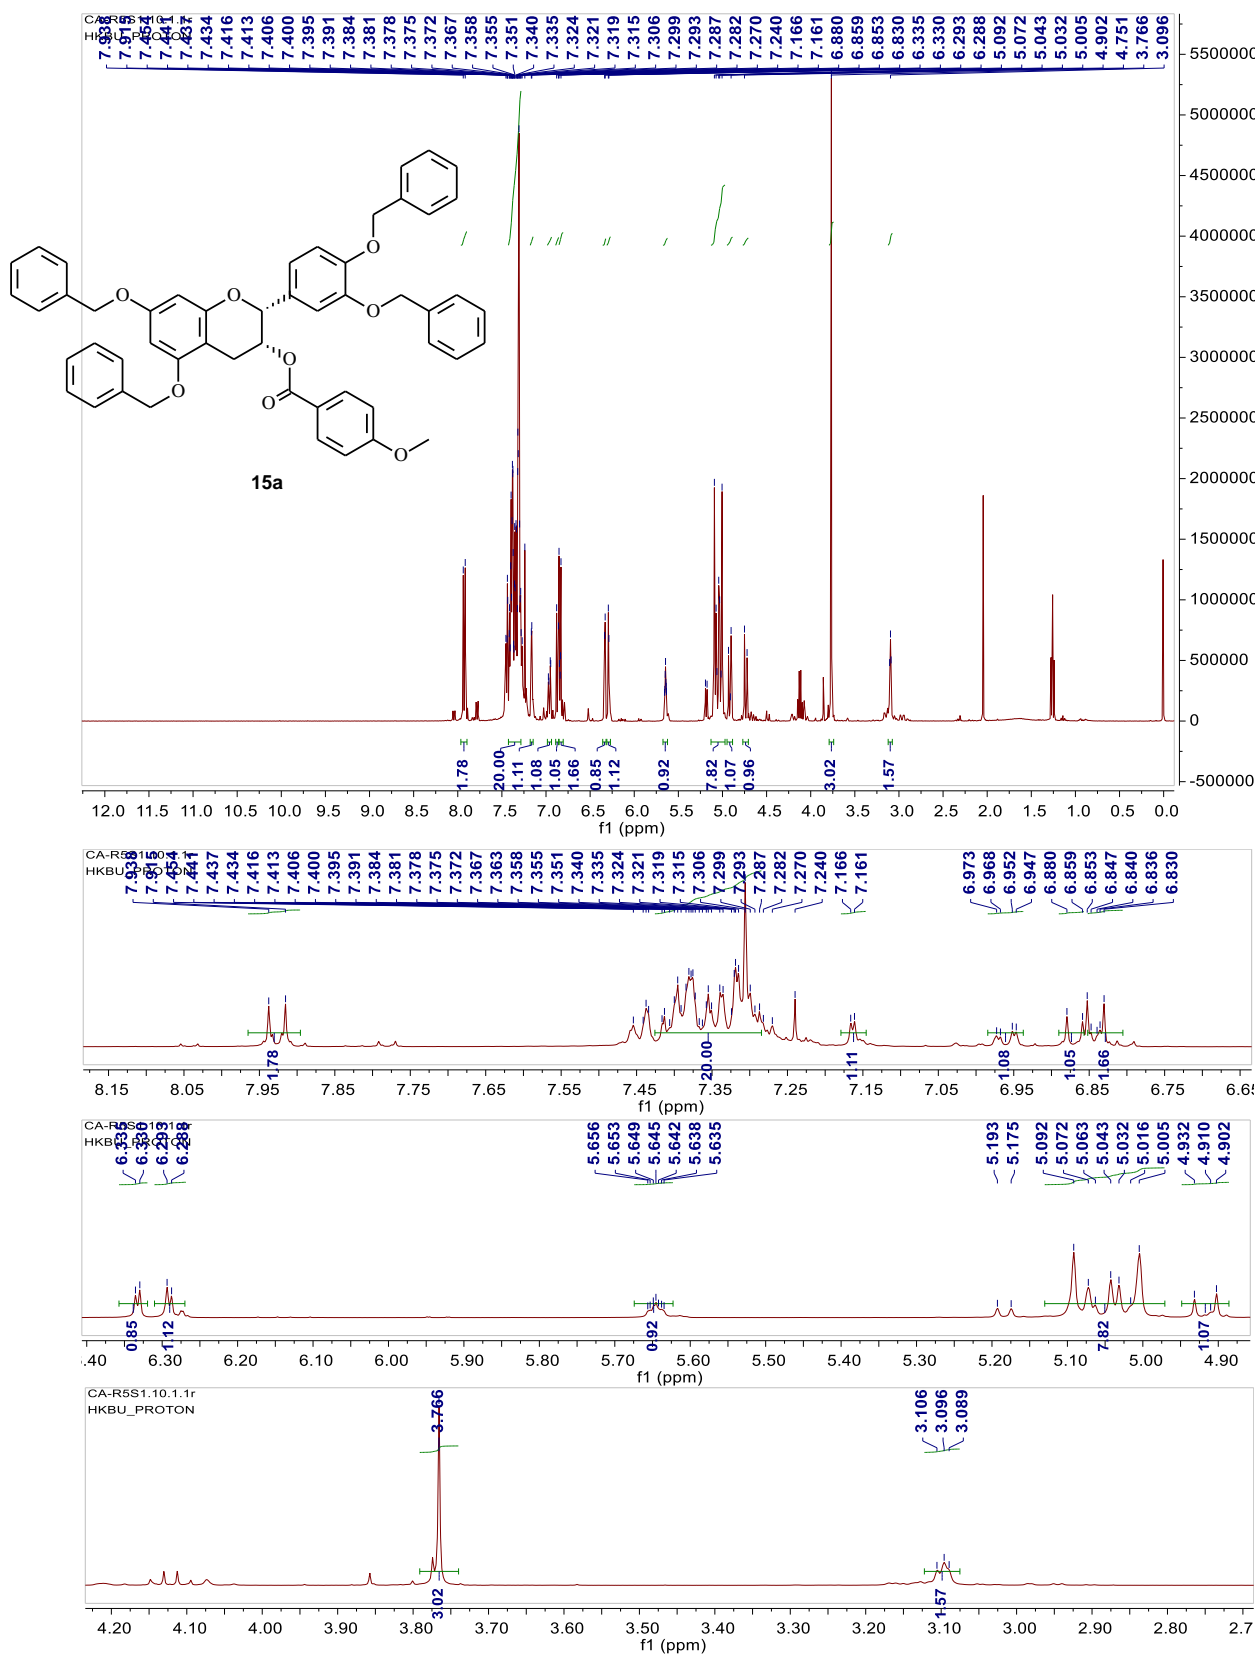

**Figure S27.** <sup>1</sup>H NMR spectrum of **15a** in CDCl<sub>3</sub> (400 MHz).

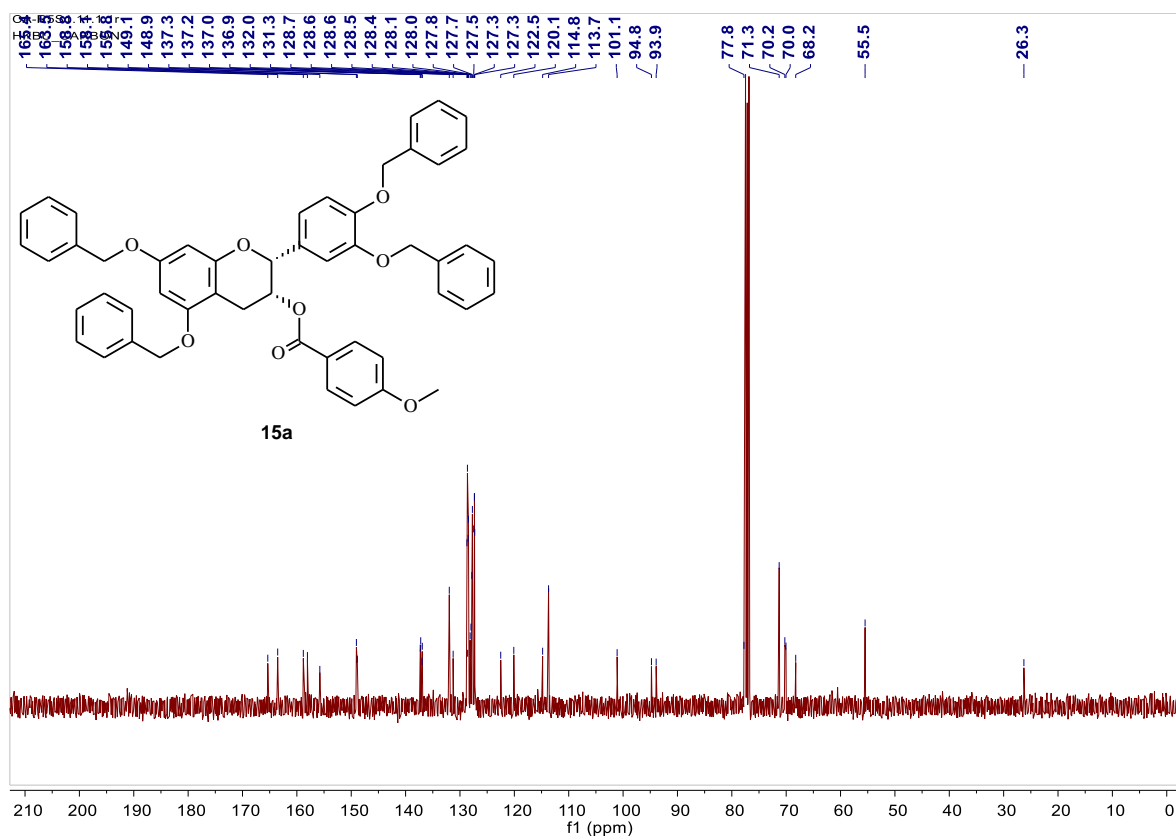

**Figure S28.**  $^{13}\text{C}$  NMR spectrum of **15a** in  $\text{CDCl}_3$  (100 MHz).

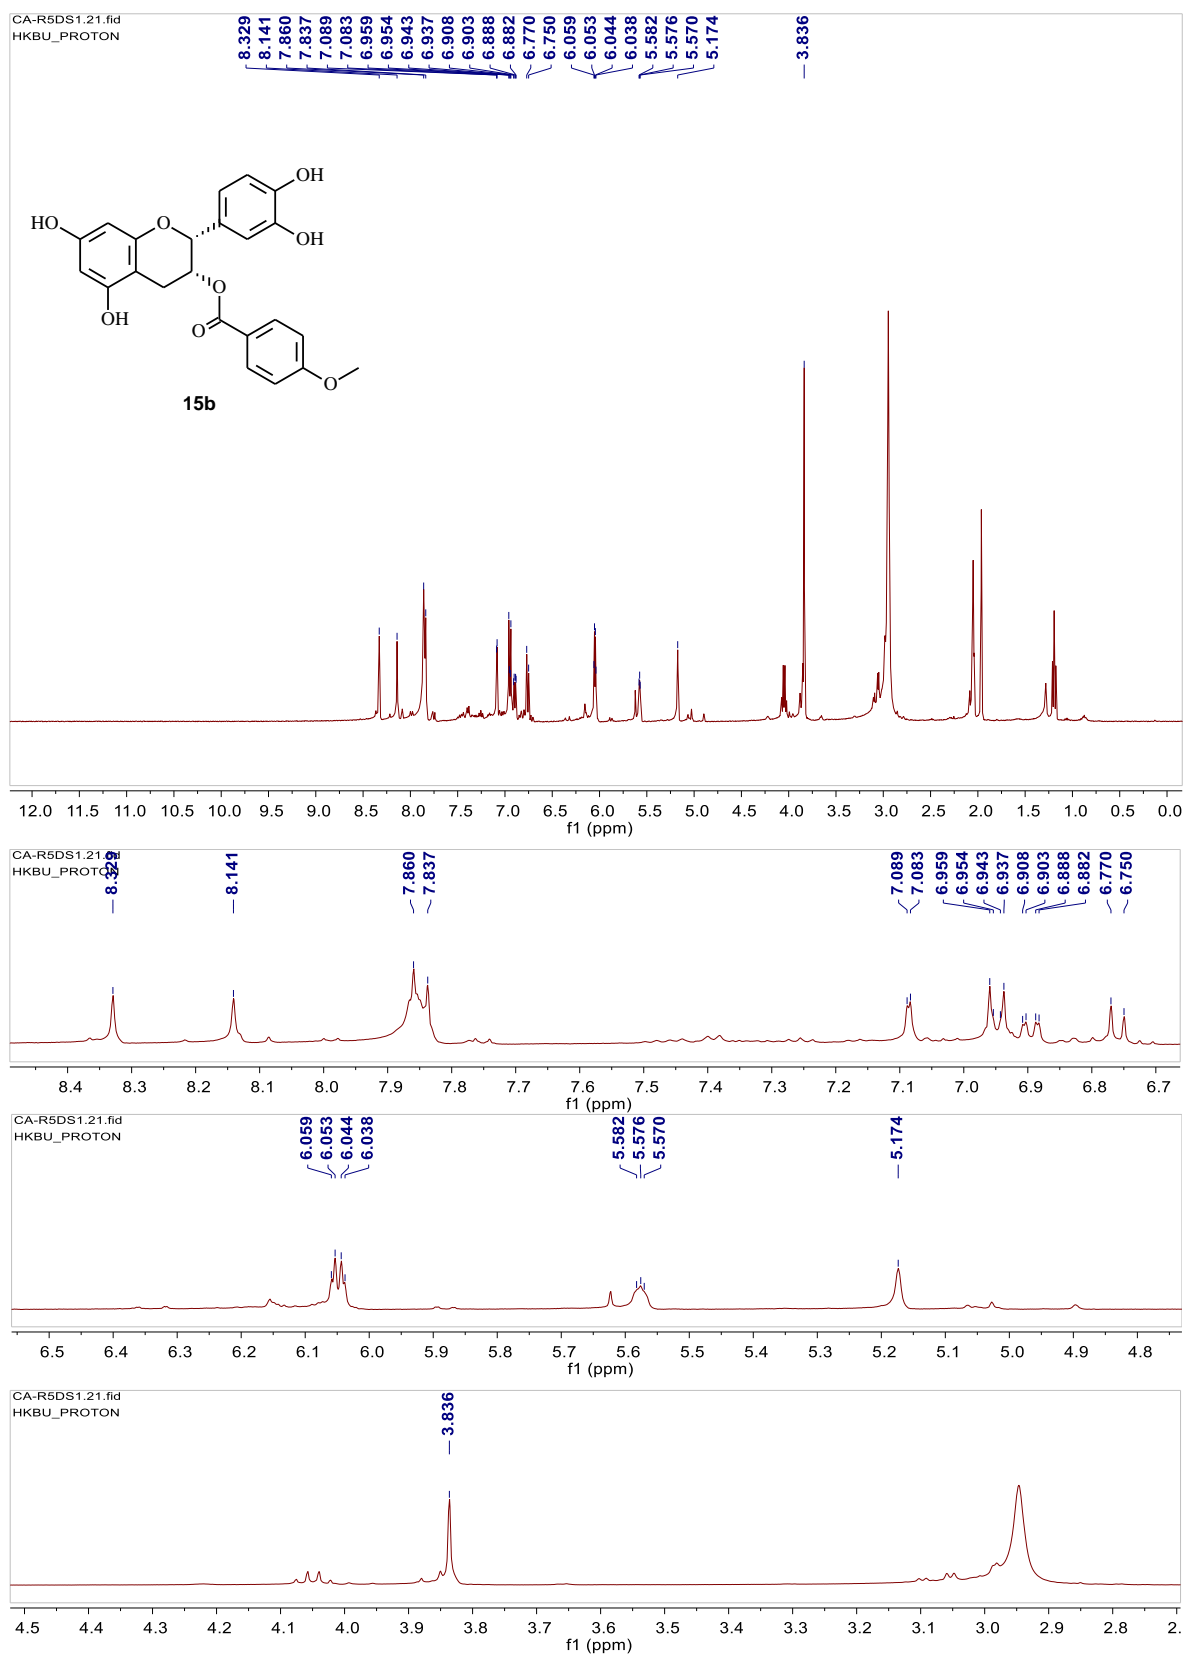

**Figure S29.**  $^1\text{H}$  NMR spectrum of **15b** in acetone- $\text{d}_6$  (400 MHz).

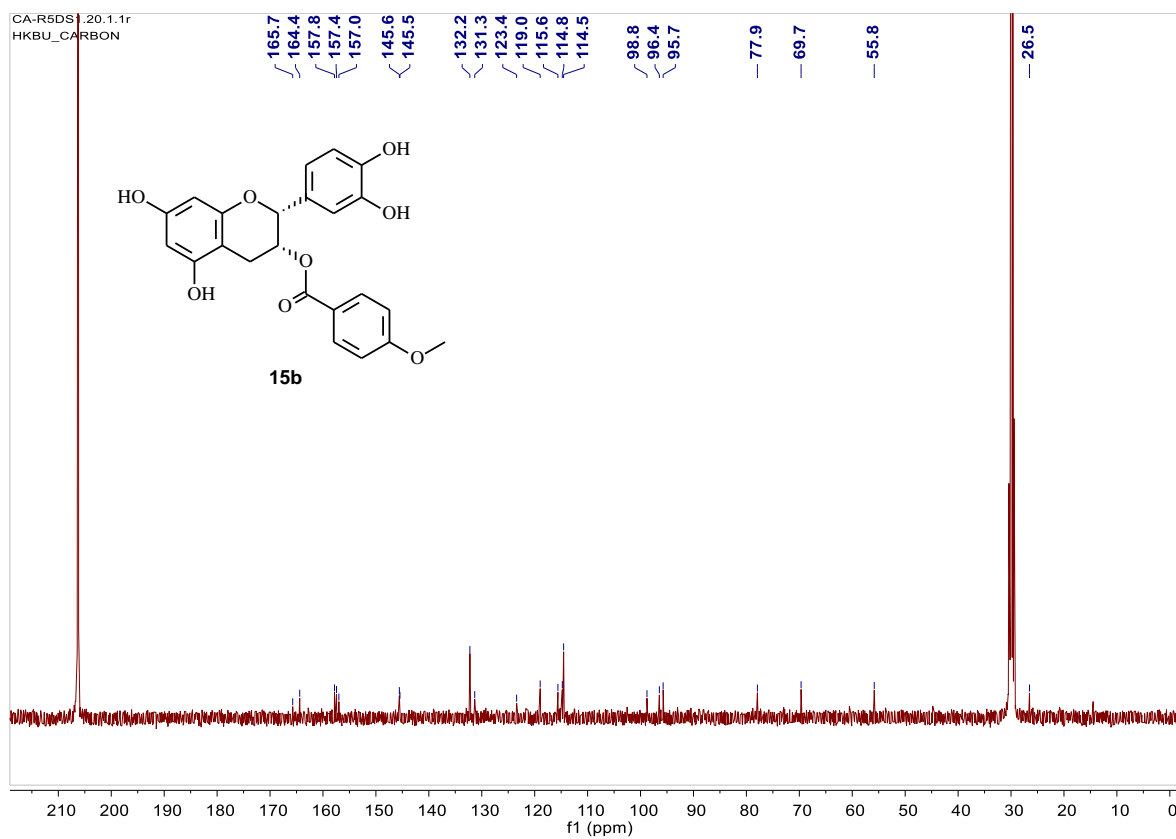

**Figure S30.**  $^{13}\text{C}$  NMR spectrum of **15b** in acetone- $\text{d}_6$  (100 MHz).

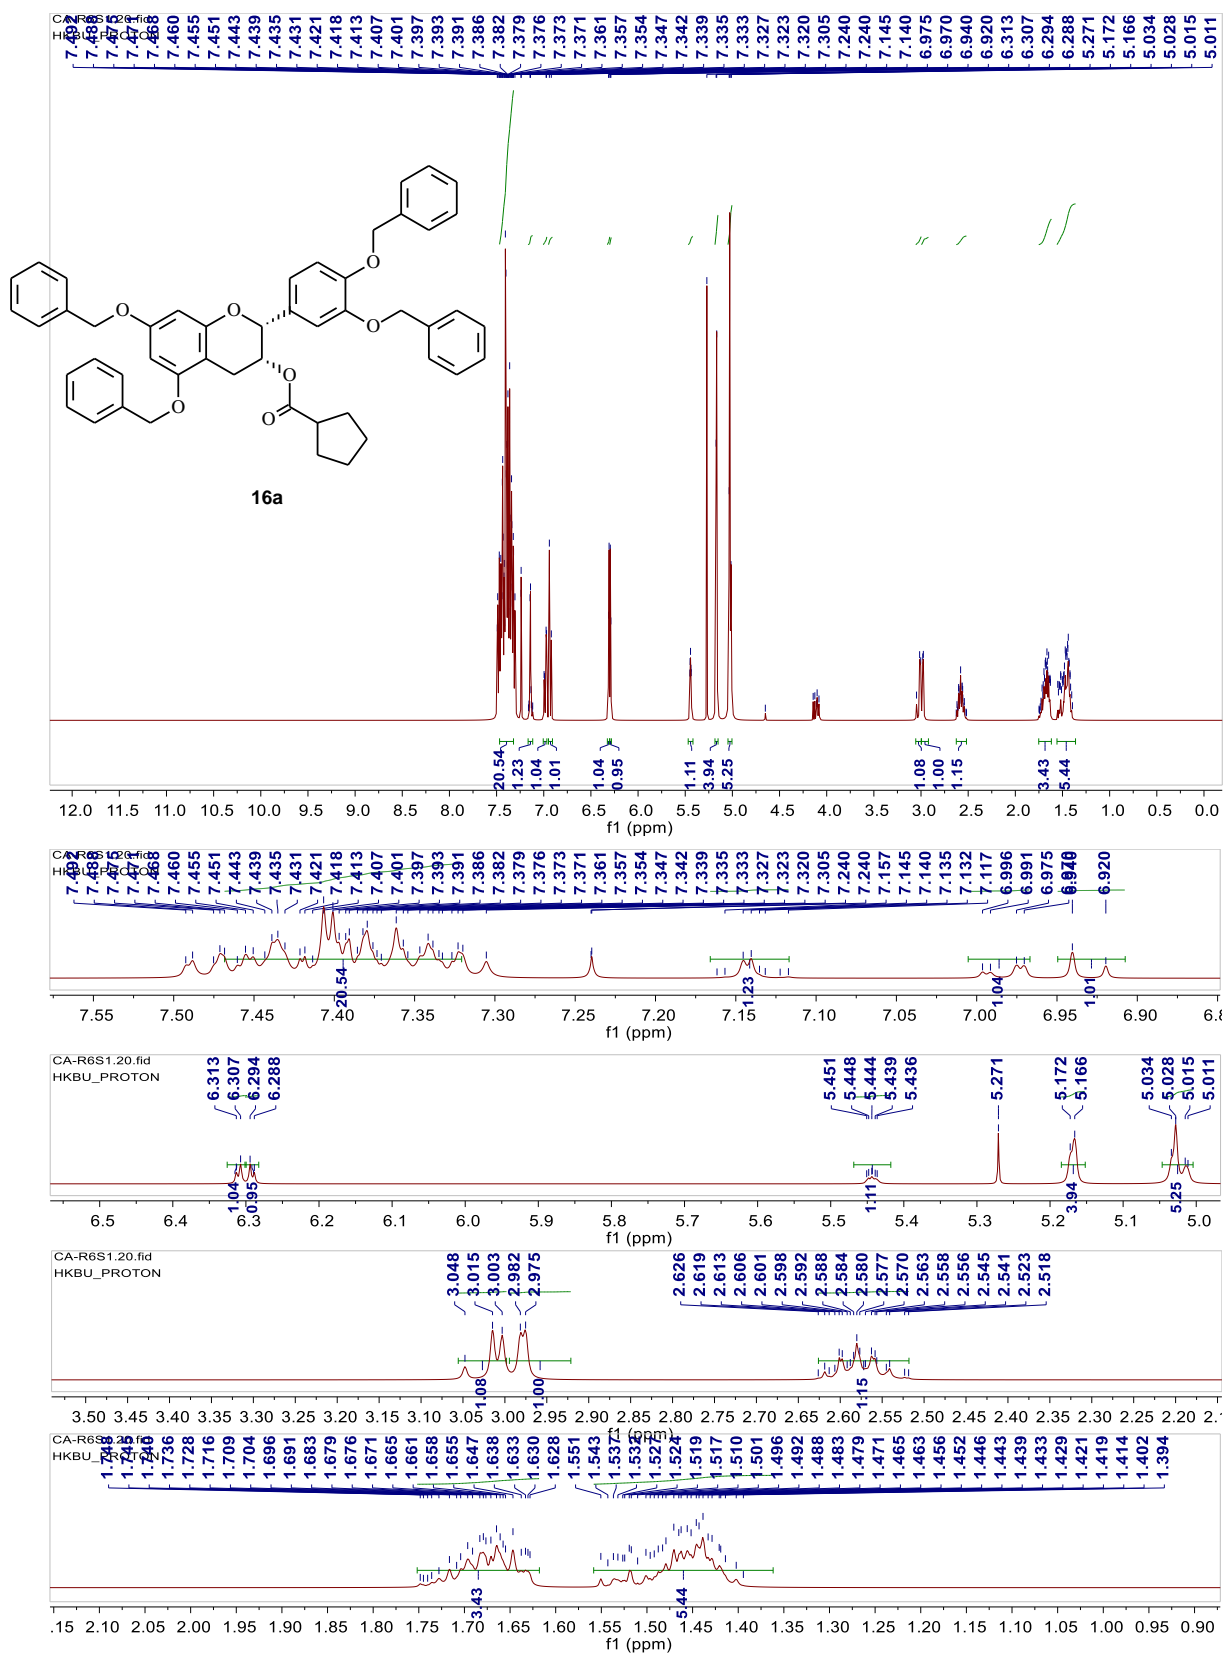

**Figure S31.** <sup>1</sup>H NMR spectrum of **16a** in CDCl<sub>3</sub> (400 MHz).

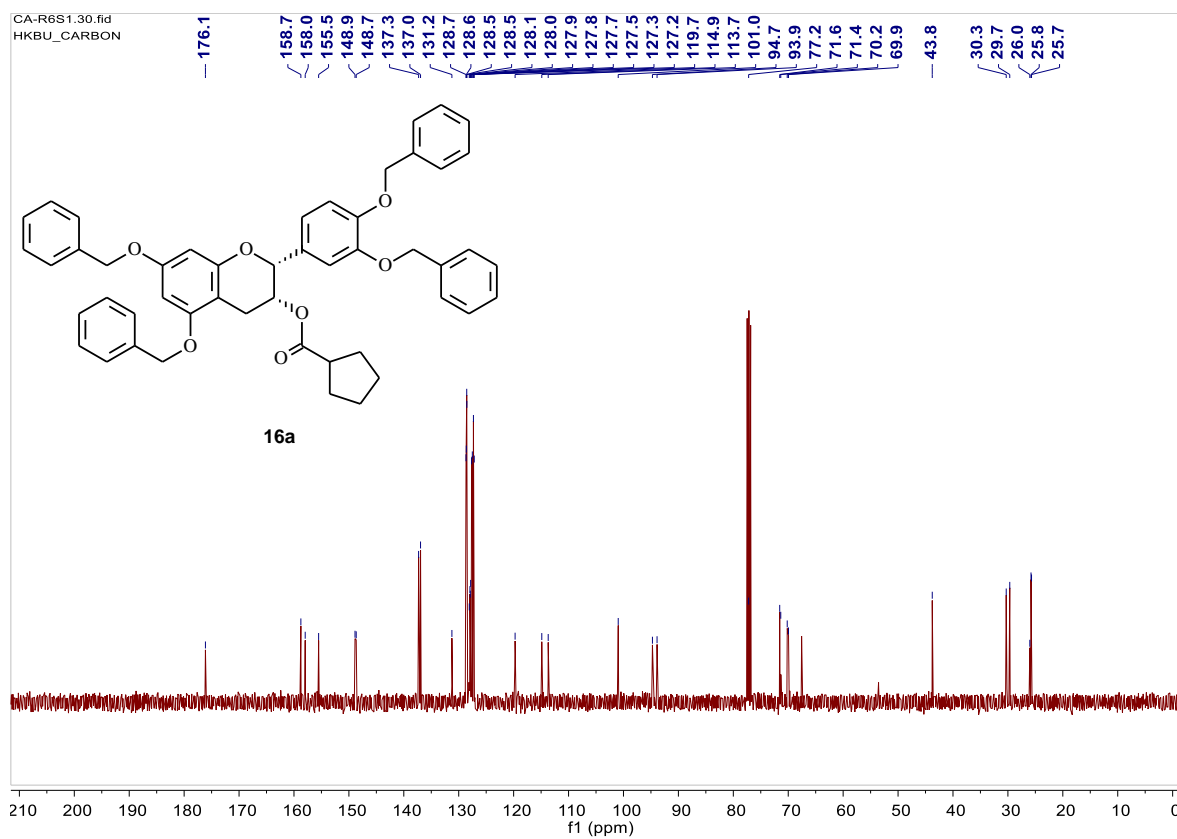

**Figure S32.**  $^{13}\text{C}$  NMR spectrum of **16a** in  $\text{CDCl}_3$  (100 MHz).



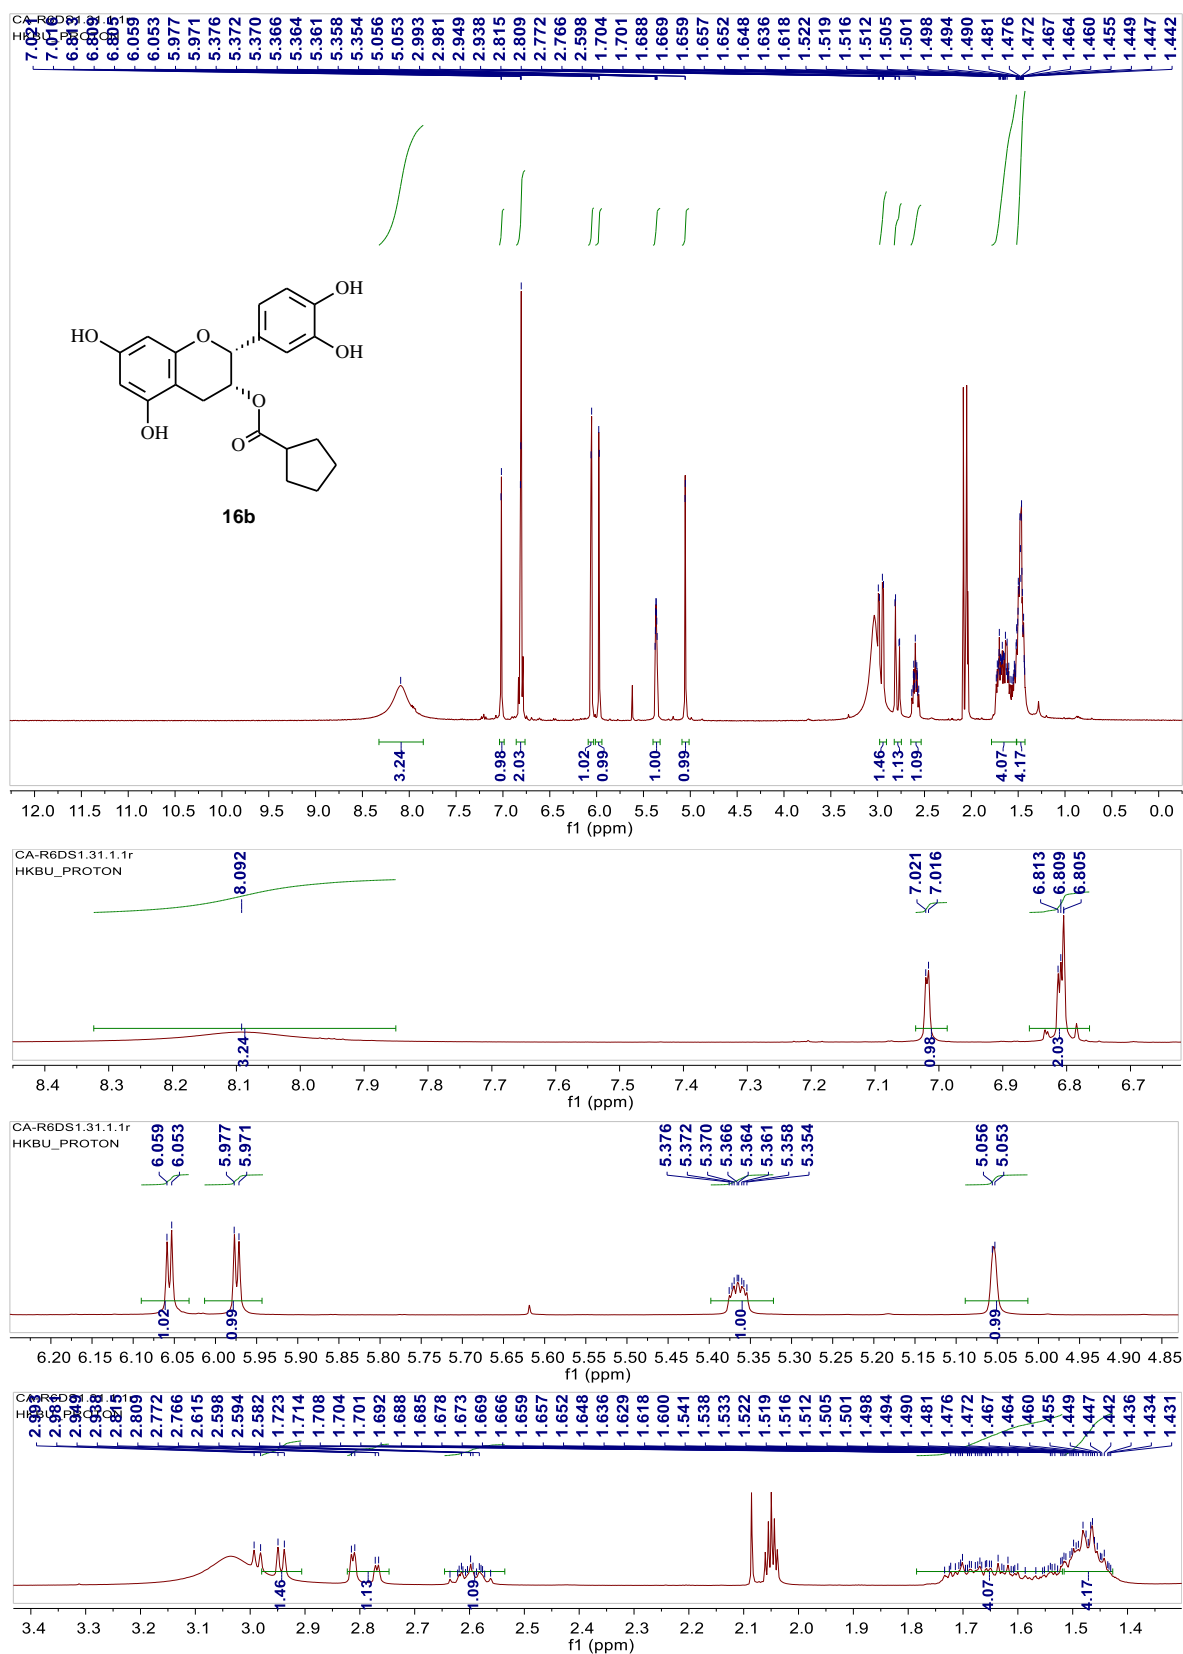

**Figure S33.** <sup>1</sup>H NMR spectrum of **16b** in acetone-d<sub>6</sub> (400 MHz).

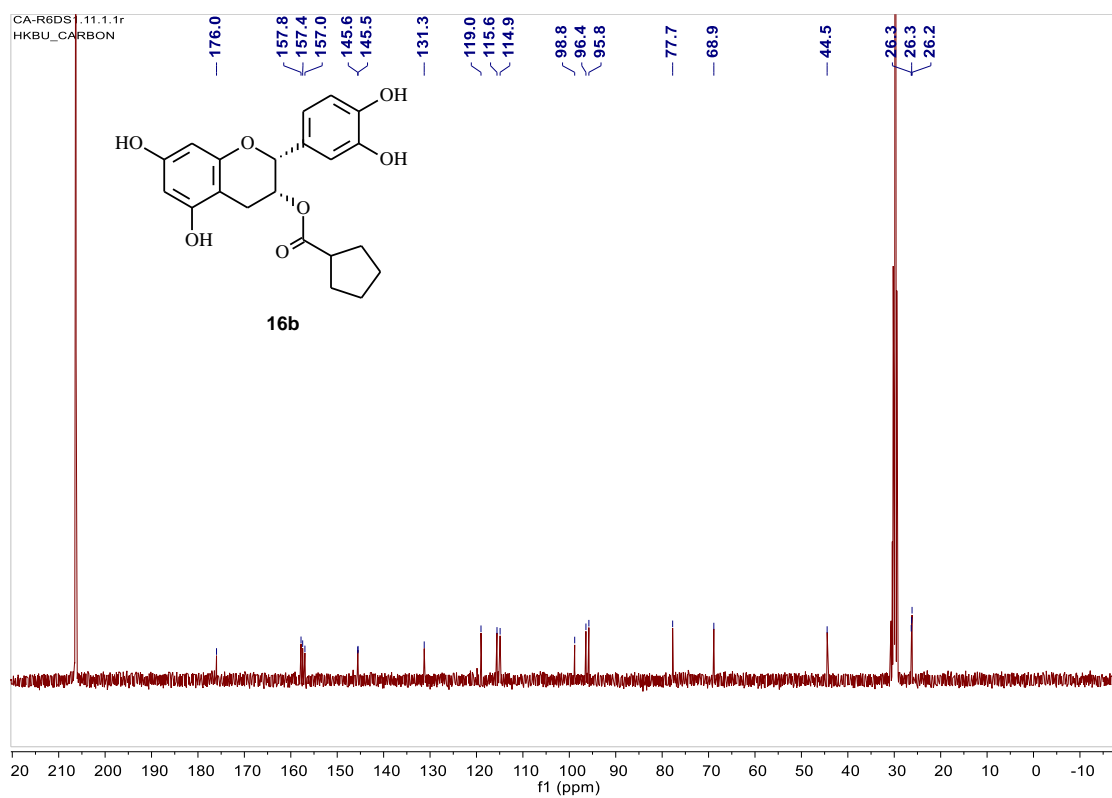

**Figure S34.**  $^{13}\text{C}$  NMR spectrum of **16b** in acetone- $\text{d}_6$  (100 MHz).

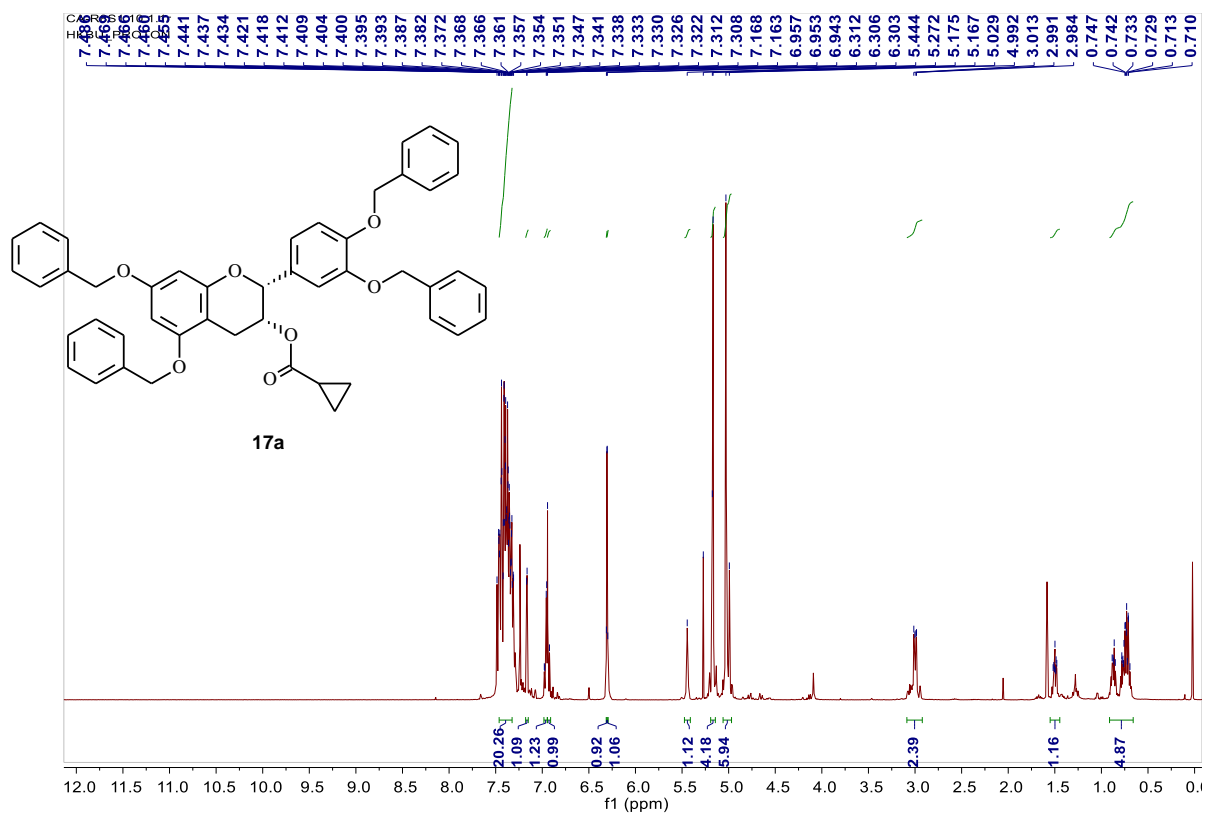

**Figure S35.** <sup>1</sup>H NMR spectrum of **17a** in CDCl<sub>3</sub> (400 MHz).



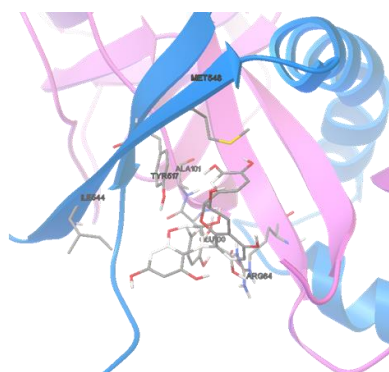

Procyanidin B2 (1)

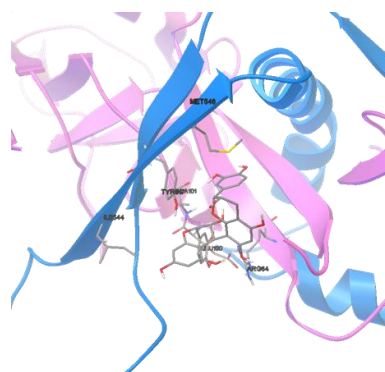

Procyanidin B1 (6)

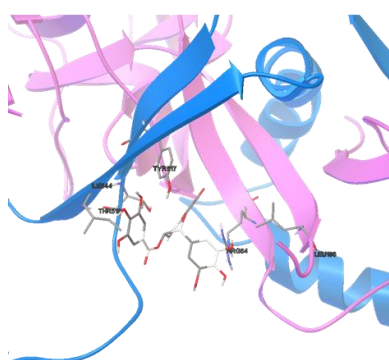

EGCG (8)

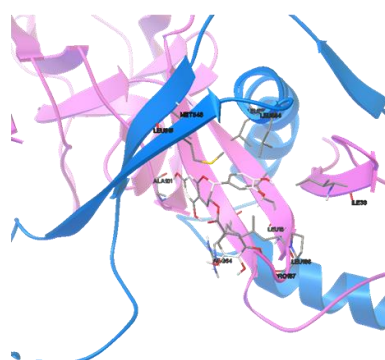

ECG (9)

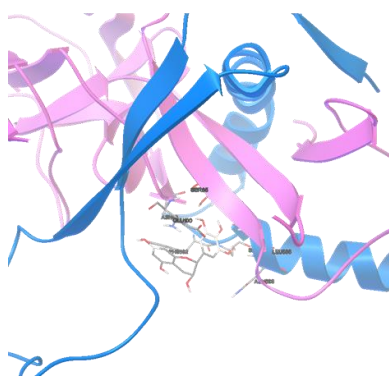

Gallocatechin (10)

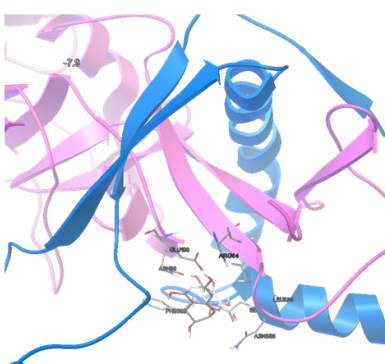

Epigallocatechin (11)

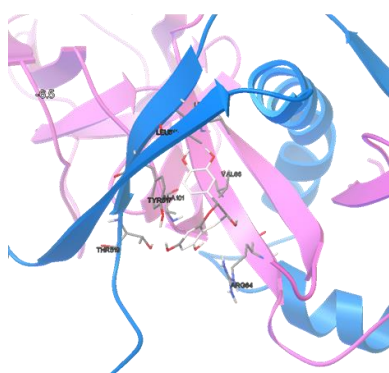

(+) Catechin (4)

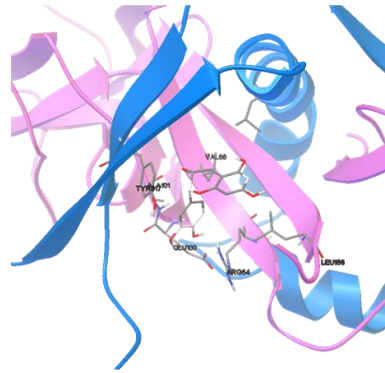

(-) Epicatechin (5)

**Figure S37.** Binding modes of compounds docked to Ebola virus glycoprotein crystal structure 5JQ7.

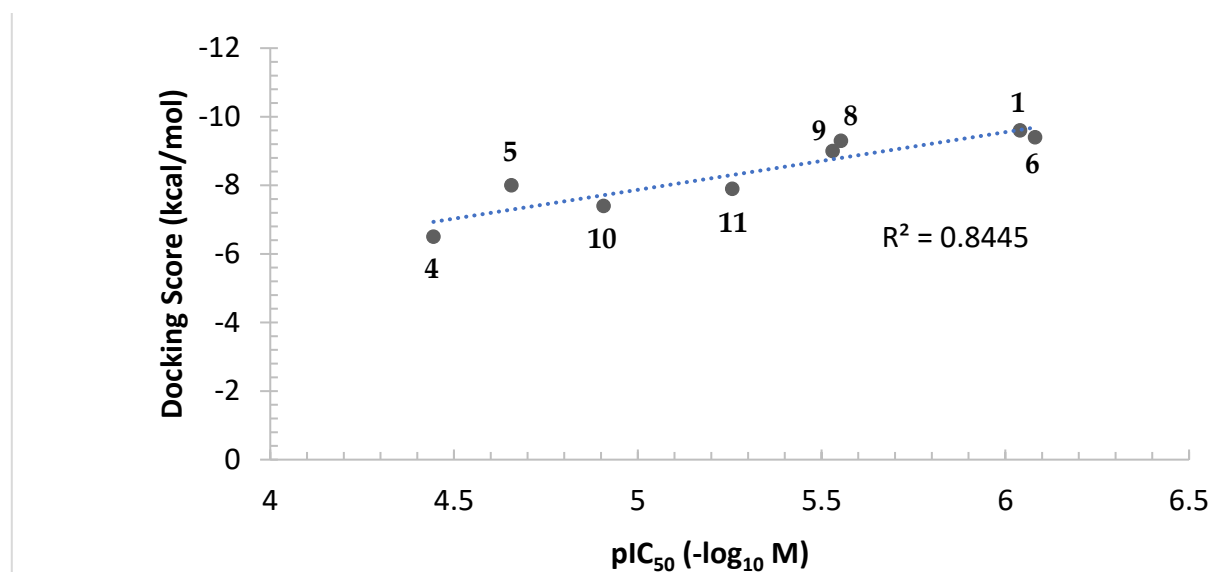

**Figure S38.** The correlation between the docking score and the  $IC_{50}$  values for B-type procyanidins, flavan-3-ols and their analogues. The numbers on the dotted line corresponds to their respective compound numbers (Pearson correlation coefficient  $r = -0.919$ ,  $p < 0.01$ ).

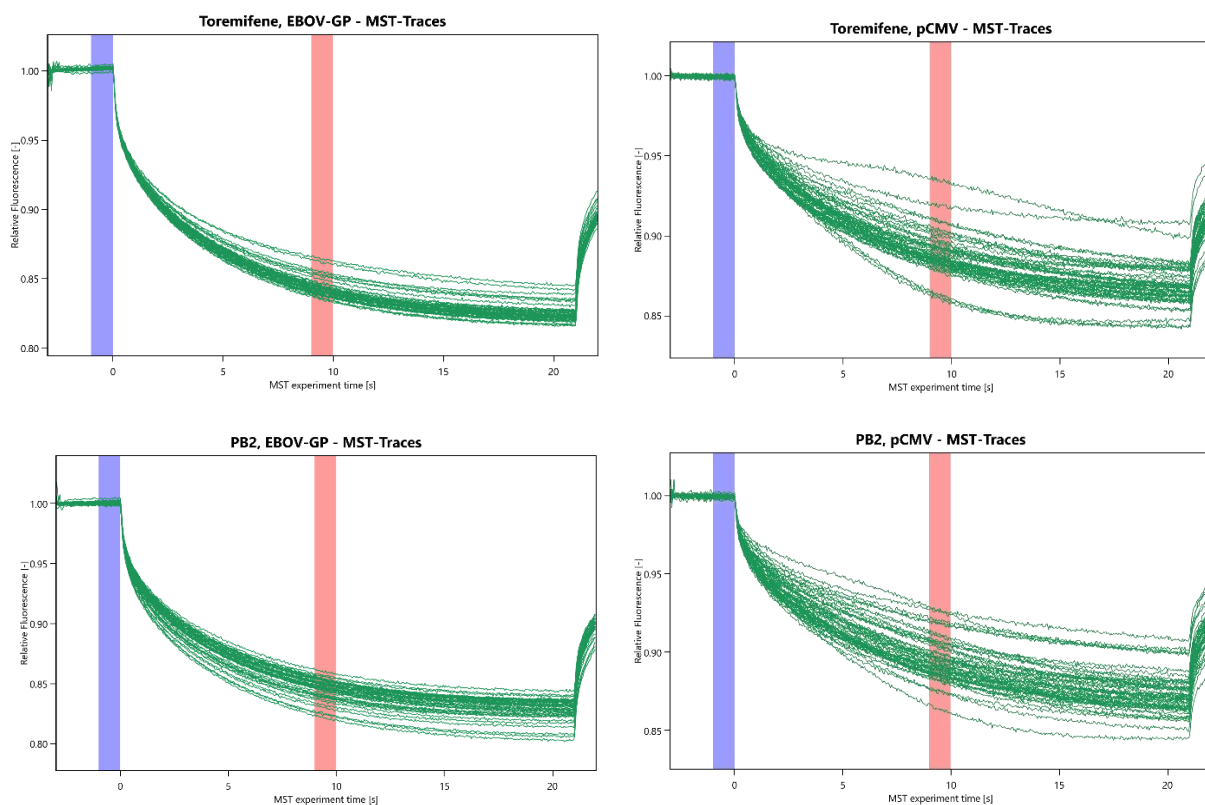

**Figure S39.** Thermographs of toremifene or procyanidin B2 (**1**) (labeled as PB2) in PBST/M-PER buffer bound to the target protein EBOV-GP. The cold region is set to 0 s (blue) and the hot region is to 10 s (red) for determination of the  $K_d$  of the interaction.

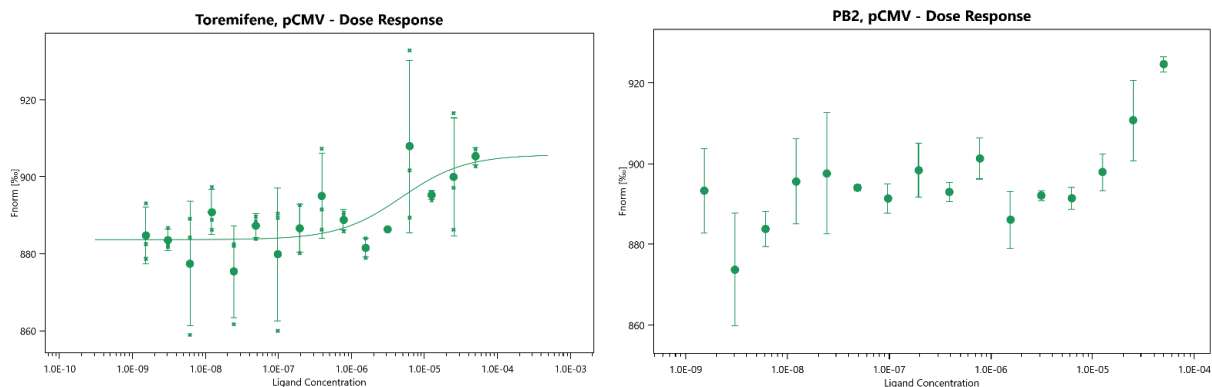

**Figure S40.** Dose-response curve for the binding interaction between pCMV (negative control) and toremifene/procyanidin B2 (**1**) (PB2).

**Table S6.** Dataset overview of MST experiments for toremifene and procyanidin B2 (**1**).

| Target Name               | EBOV-GP C-His                                   | pCMV C-His             | EBOV-GP C-His                                   | pCMV C-His             |
|---------------------------|-------------------------------------------------|------------------------|-------------------------------------------------|------------------------|
| Target Concentration (nM) | 25                                              | 25                     | 25                                              | 25                     |
| Ligand Name               | Toremifene                                      | Toremifene             | Procyanidin B2                                  | Procyanidin B2         |
| Ligand Concentration (nM) | $1.53 - 5 \times 10^4$                          | $1.53 - 5 \times 10^4$ | $1.53 - 5 \times 10^4$                          | $1.53 - 5 \times 10^4$ |
| Number of experiments     | 3                                               | 3                      | 3                                               | 3                      |
| Excitation Power          | 30%                                             | 30%                    | 30%                                             | 30%                    |
| MST Power                 | 40%                                             | 40%                    | 40%                                             | 40%                    |
| Temperature               | 25.0°C                                          | 25.0°C                 | 25.0°C                                          | 25.0°C                 |
| $K_d$ (M)                 | $2.1406 \times 10^{-5}$                         | —                      | $1.299 \times 10^{-5}$                          | —                      |
| $K_d$ Confidence (M)      | $6.4005 \times 10^{-6} - 7.1589 \times 10^{-5}$ | —                      | $5.5968 \times 10^{-6} - 3.0148 \times 10^{-5}$ | —                      |
| Signal to Noise           | 12.288503                                       | —                      | 13.518011                                       | —                      |
